# Supplementary material
Source: publisher figshare collection journal article supplement (https://acs.figshare.com/ndownloader/files/23820013)
Supplement: Supplementary file 1 [file 23820013]

## Supporting Information

### **Silver(I) complexes with camphorsulfonato and phosphine ligands: Structural diversity and antibacterial activity.**

Julia Kuchar<sup>a</sup>, Jörg Rust<sup>b</sup>, Christian W. Lehmann<sup>b</sup> and Fabian Mohr<sup>a,\*</sup>

<sup>a</sup> *Fakultät für Mathematik und Naturwissenschaften, Anorganische Chemie, Bergische Universität Wuppertal, Gaußstr. 20, 42119 Wuppertal, Germany*

<sup>b</sup> *Chemische Kristallographie, Max-Planck-Institut für Kohlenforschung, Kaiser-Wilhelm- Platz 1, 45470 Mülheim an der Ruhr, Germany*

### **Contents**

<sup>1</sup>H, <sup>13</sup>C{<sup>1</sup>H} and <sup>31</sup>P{<sup>1</sup>H}-NMR spectra of complexes **1-8**

Experimental details of the antimicrobial assay.

# $^1\text{H}$ , $^{13}\text{C}\{^1\text{H}\}$ and $^{31}\text{P}\{^1\text{H}\}$ -NMR spectra

## Complex 1

### $^1\text{H}$ -NMR in $\text{D}_2\text{O}$

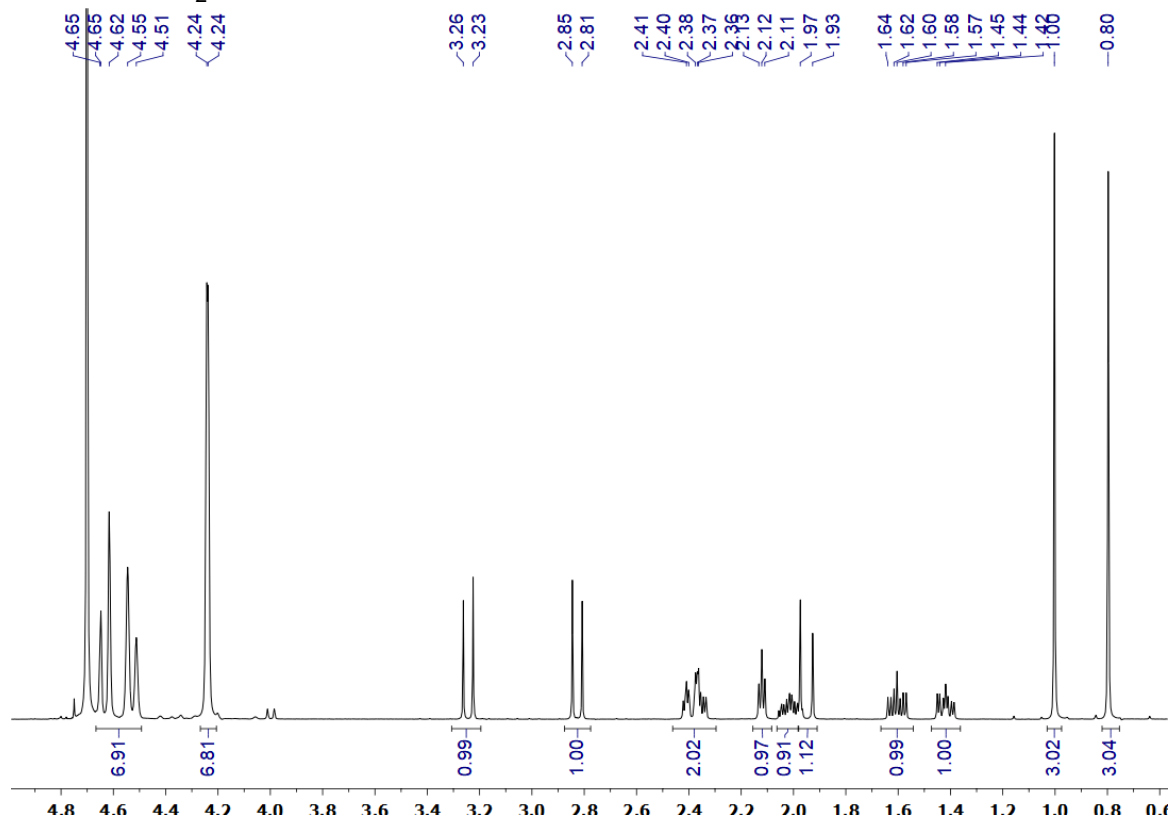

### $^{13}\text{C}\{^1\text{H}\}$ -NMR in $\text{D}_2\text{O}$

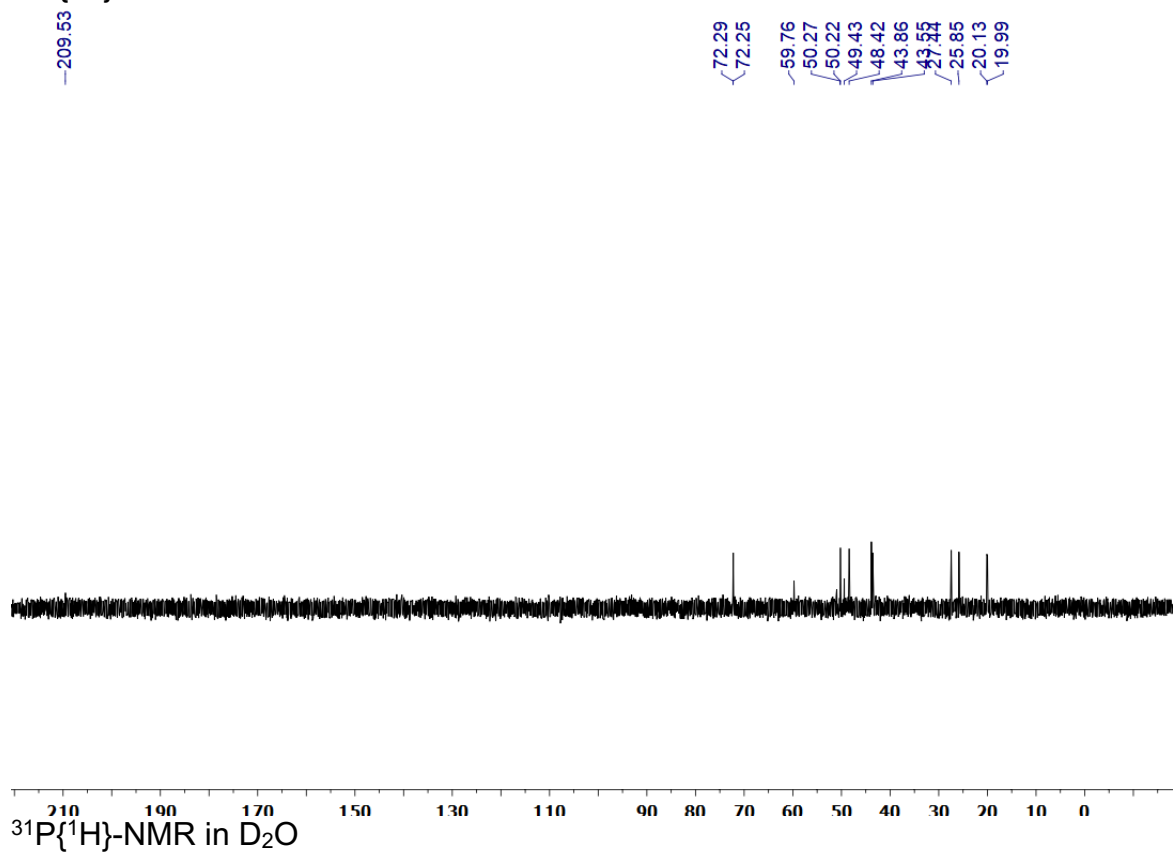

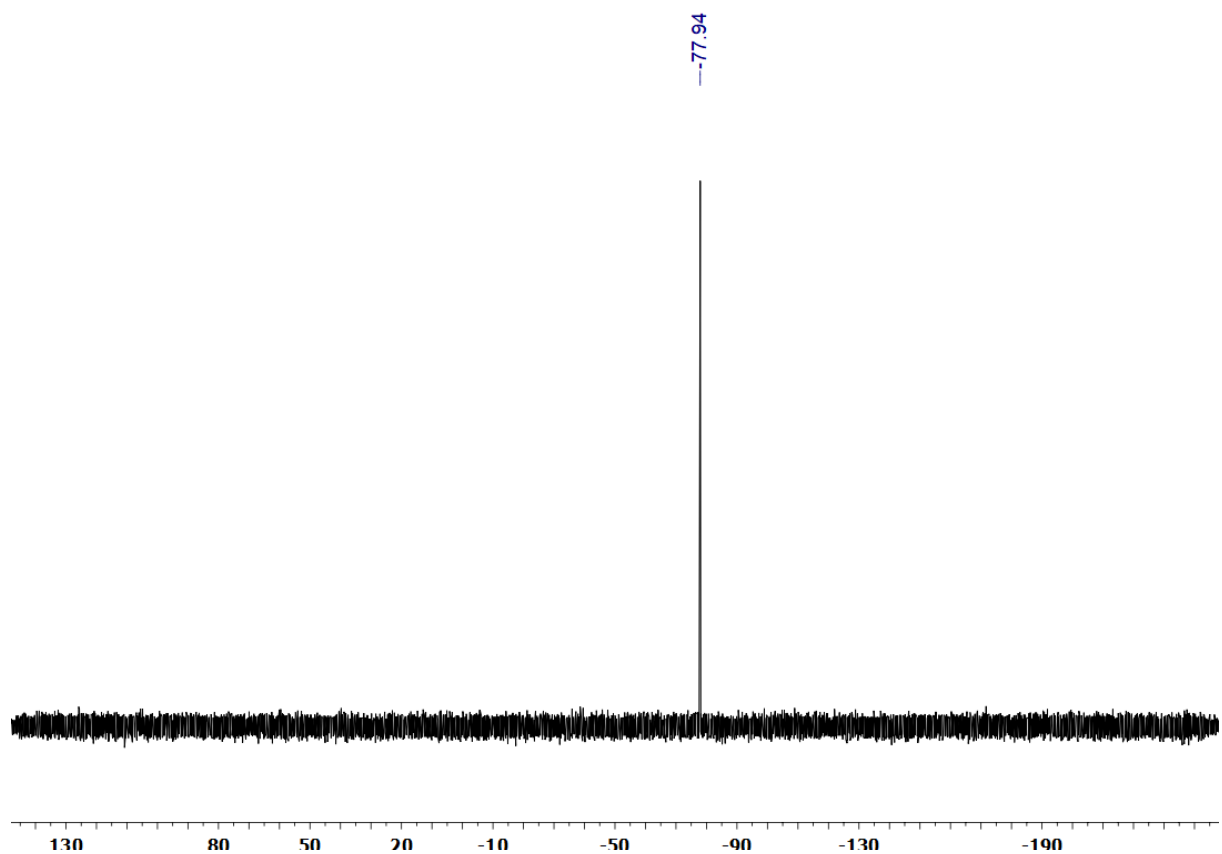

# Complex 2

$^1\text{H}$ -NMR in  $\text{CDCl}_3$

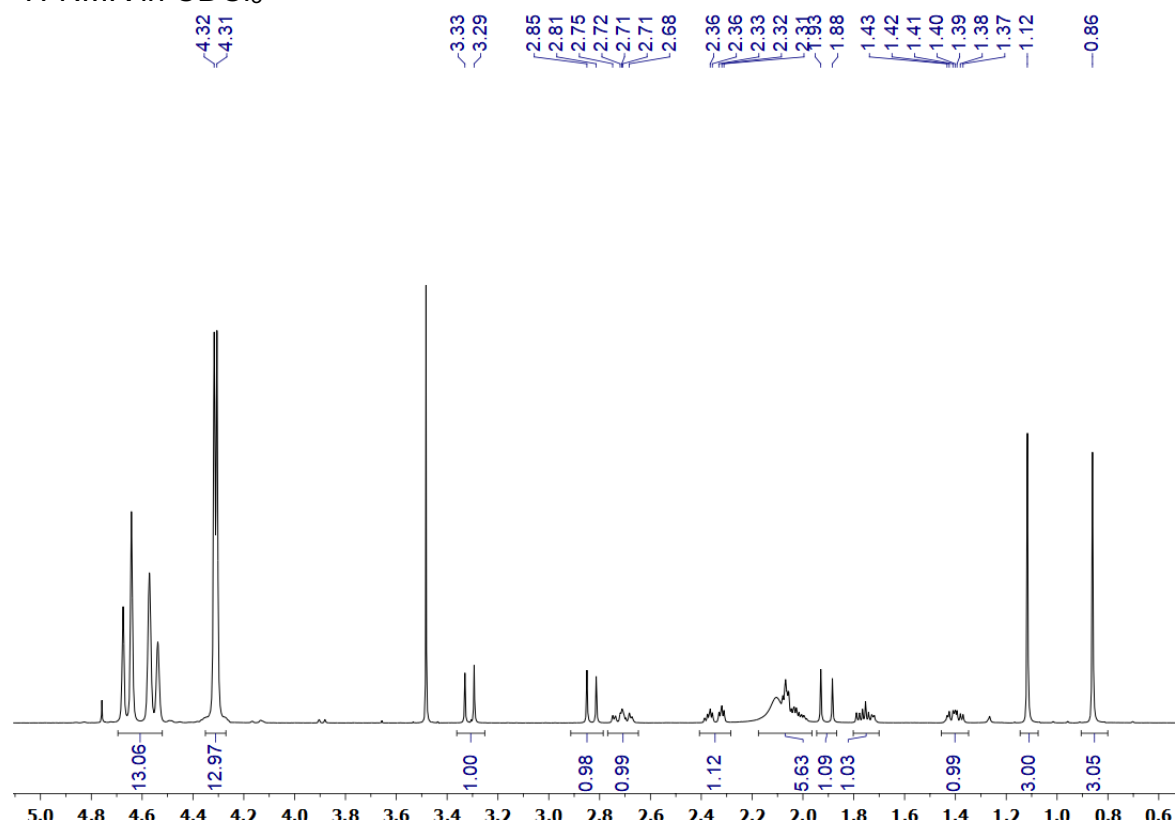

$^{13}\text{C}\{^1\text{H}\}$ -NMR in  $\text{CDCl}_3$

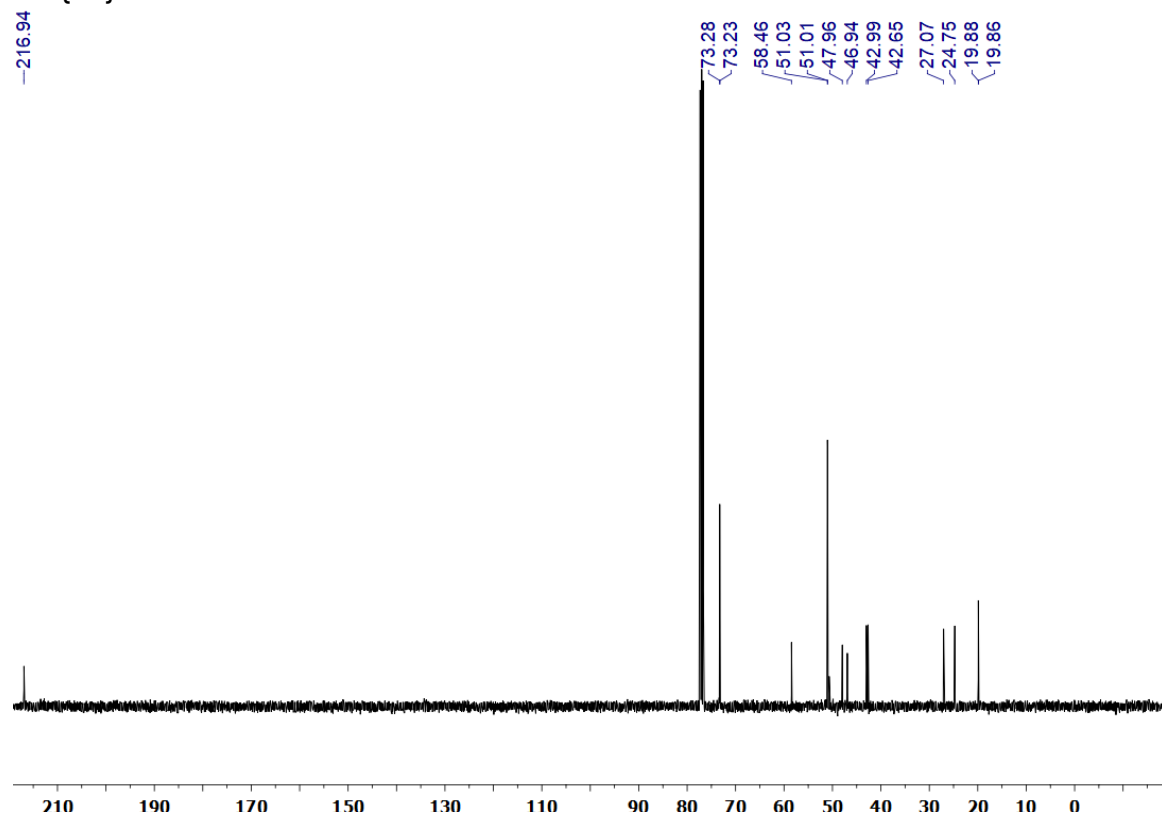

$^{31}\text{P}\{^1\text{H}\}$ -NMR in  $\text{CDCl}_3$

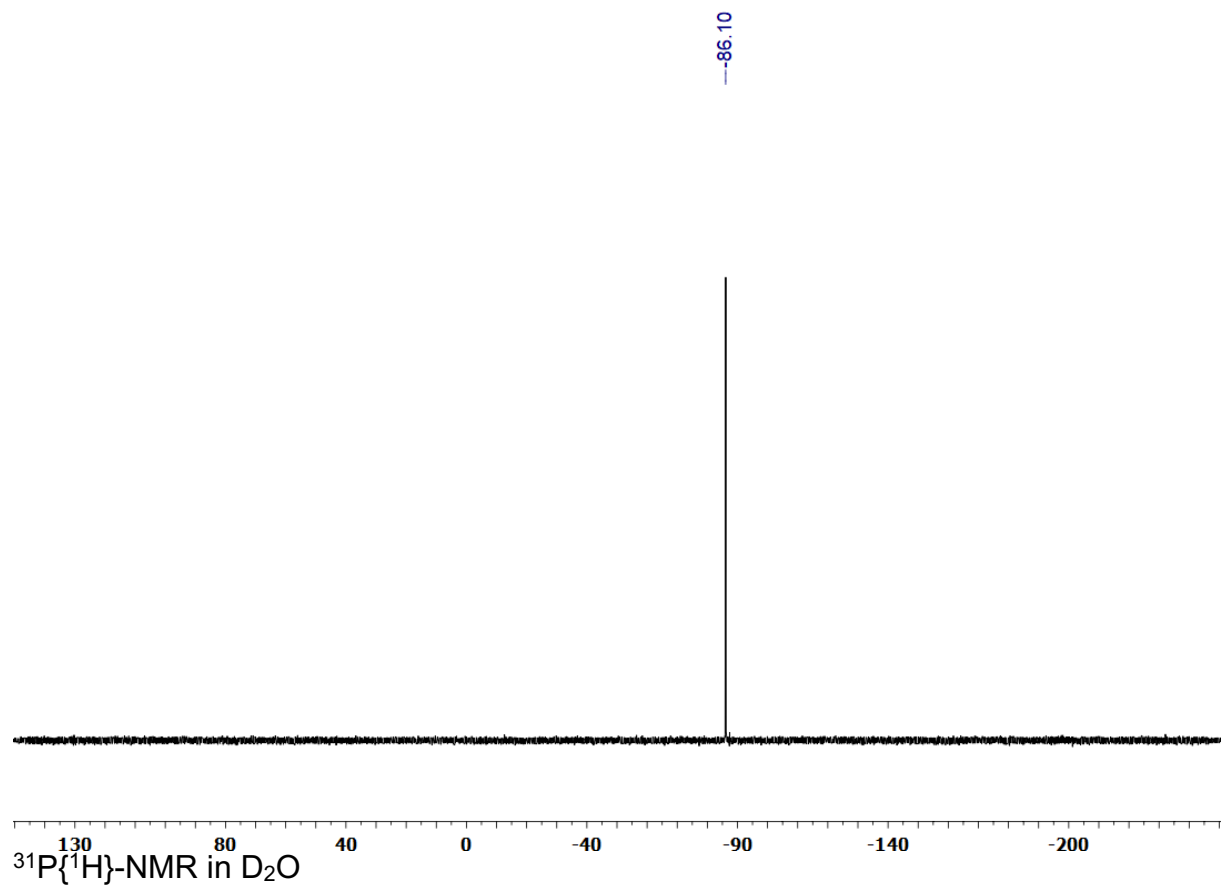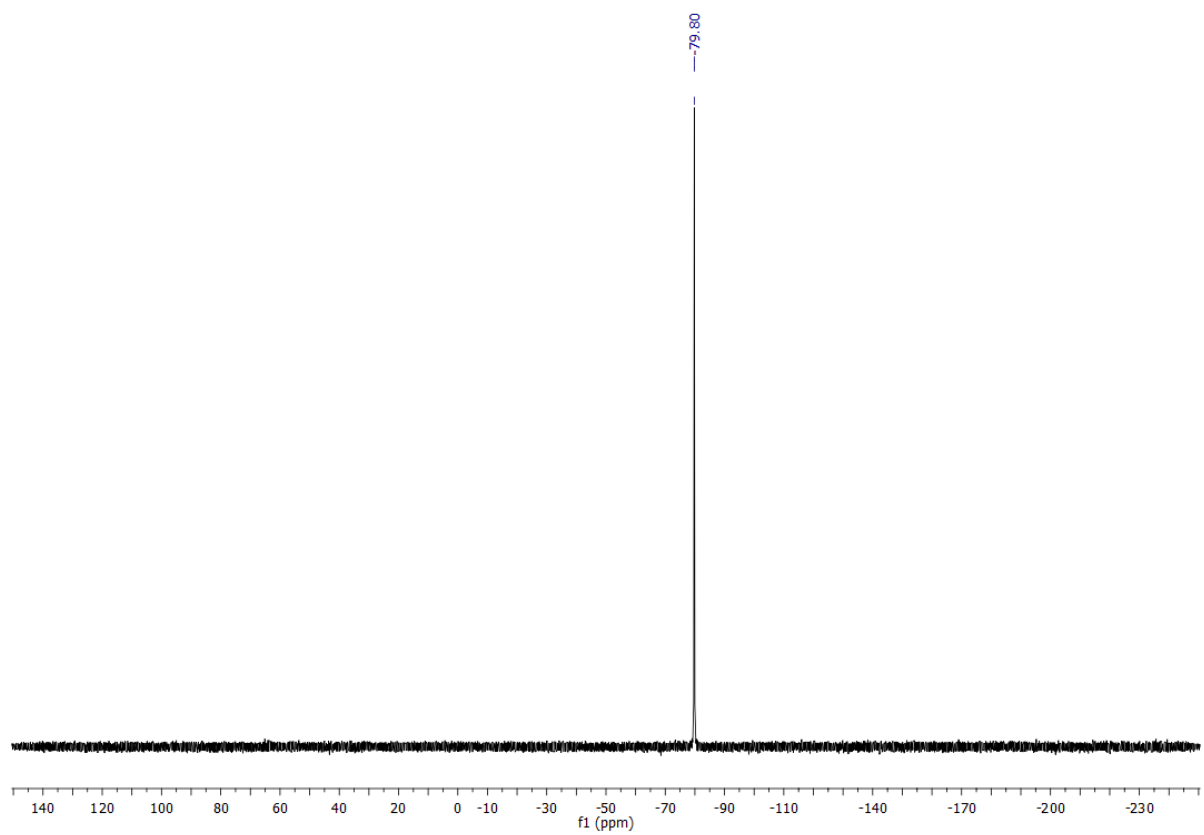

### Complex 3

$^1\text{H}$ -NMR in  $\text{D}_2\text{O}$

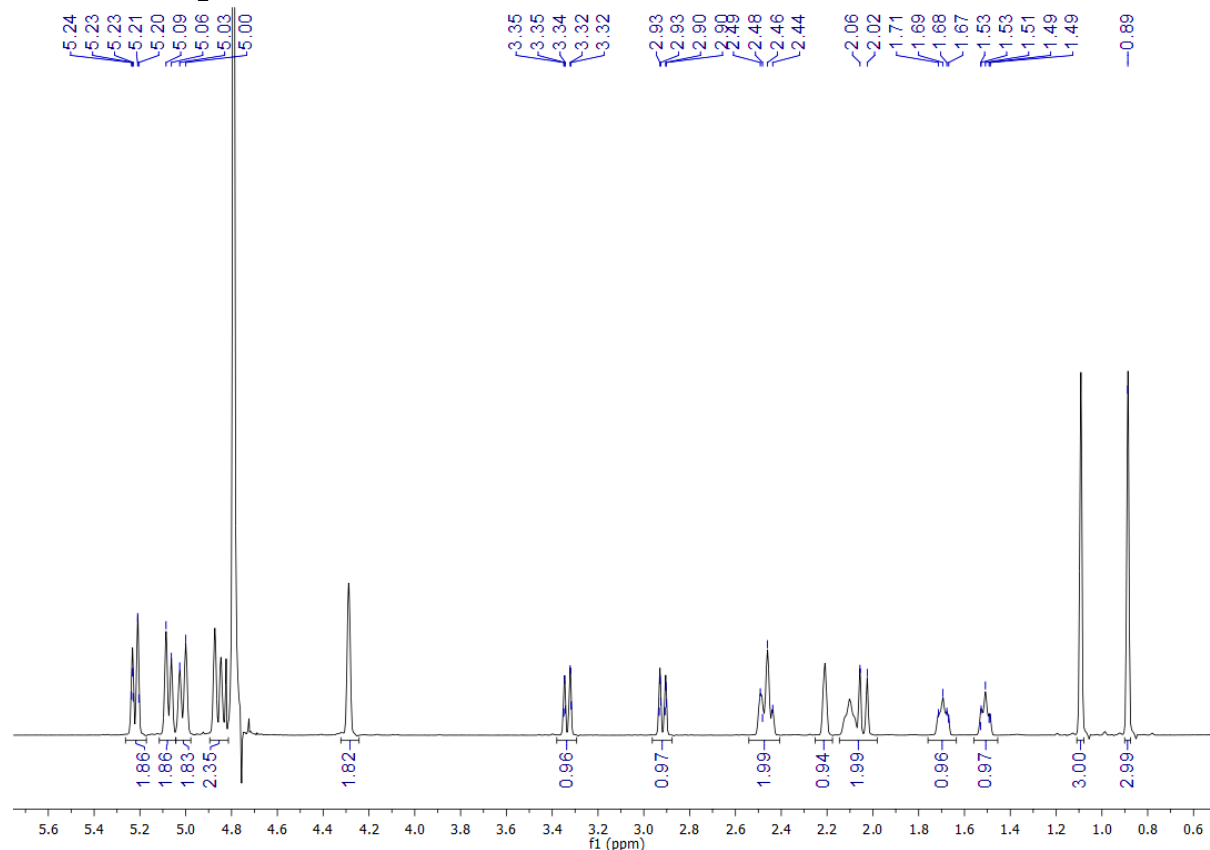

$^{13}\text{C}\{^1\text{H}\}$ -NMR in  $\text{D}_2\text{O}$

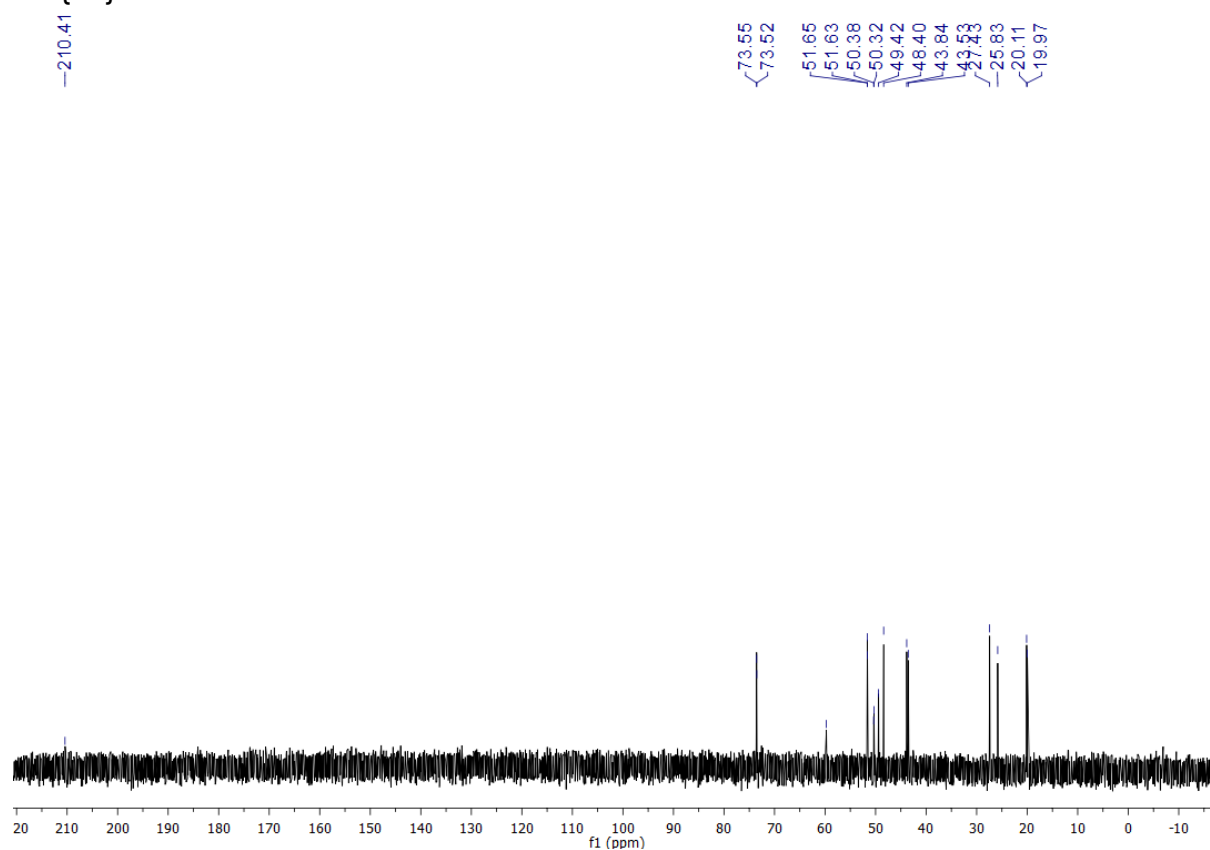

$^{31}\text{P}\{^1\text{H}\}$ -NMR in  $\text{D}_2\text{O}$

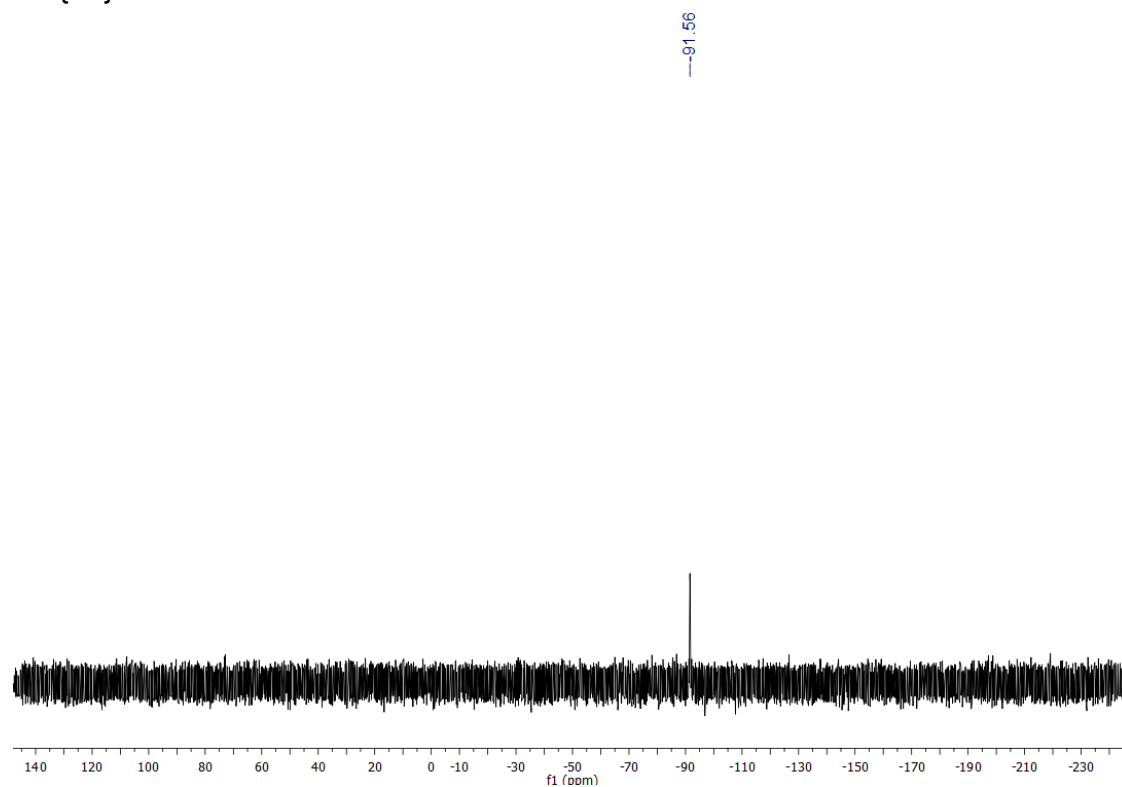

## Complex 4

$^1\text{H}$ -NMR in  $\text{CDCl}_3$

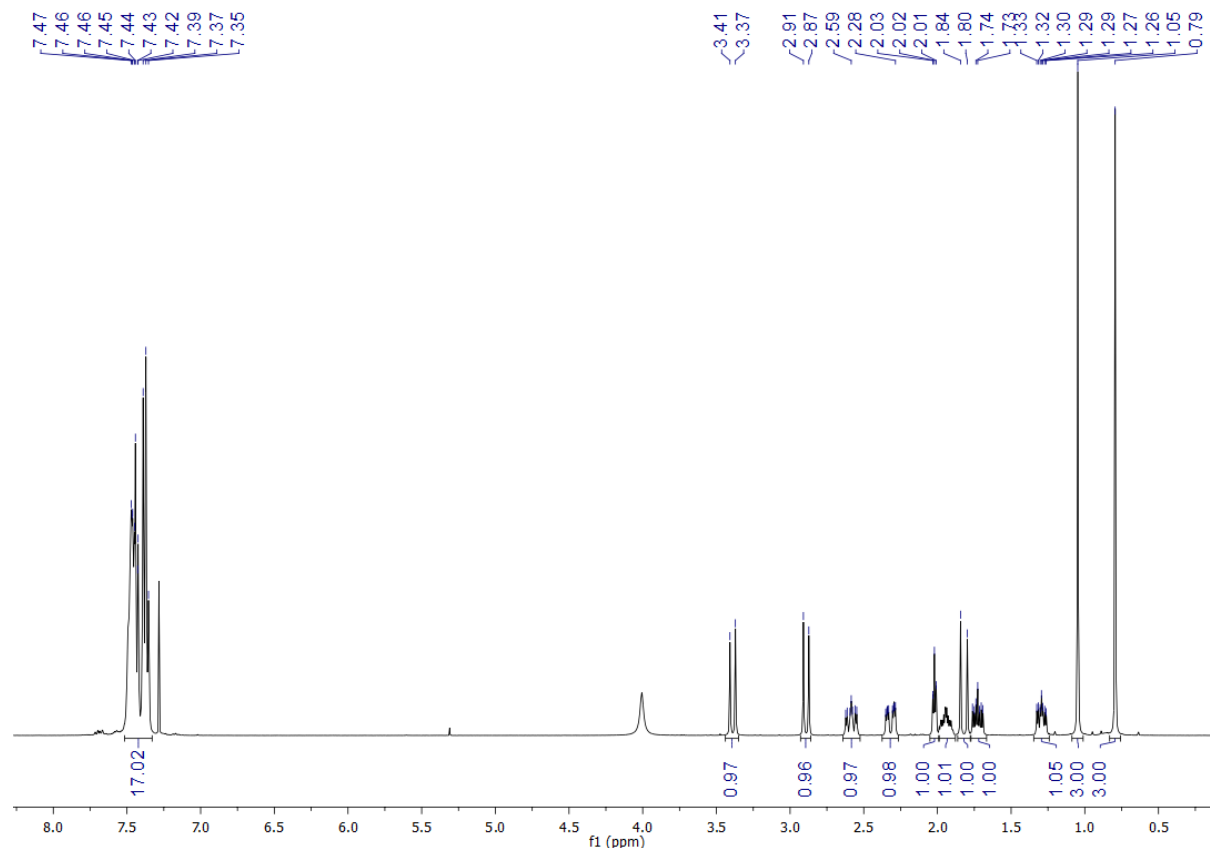

$^{13}\text{C}\{^1\text{H}\}$ -NMR in  $\text{CDCl}_3$

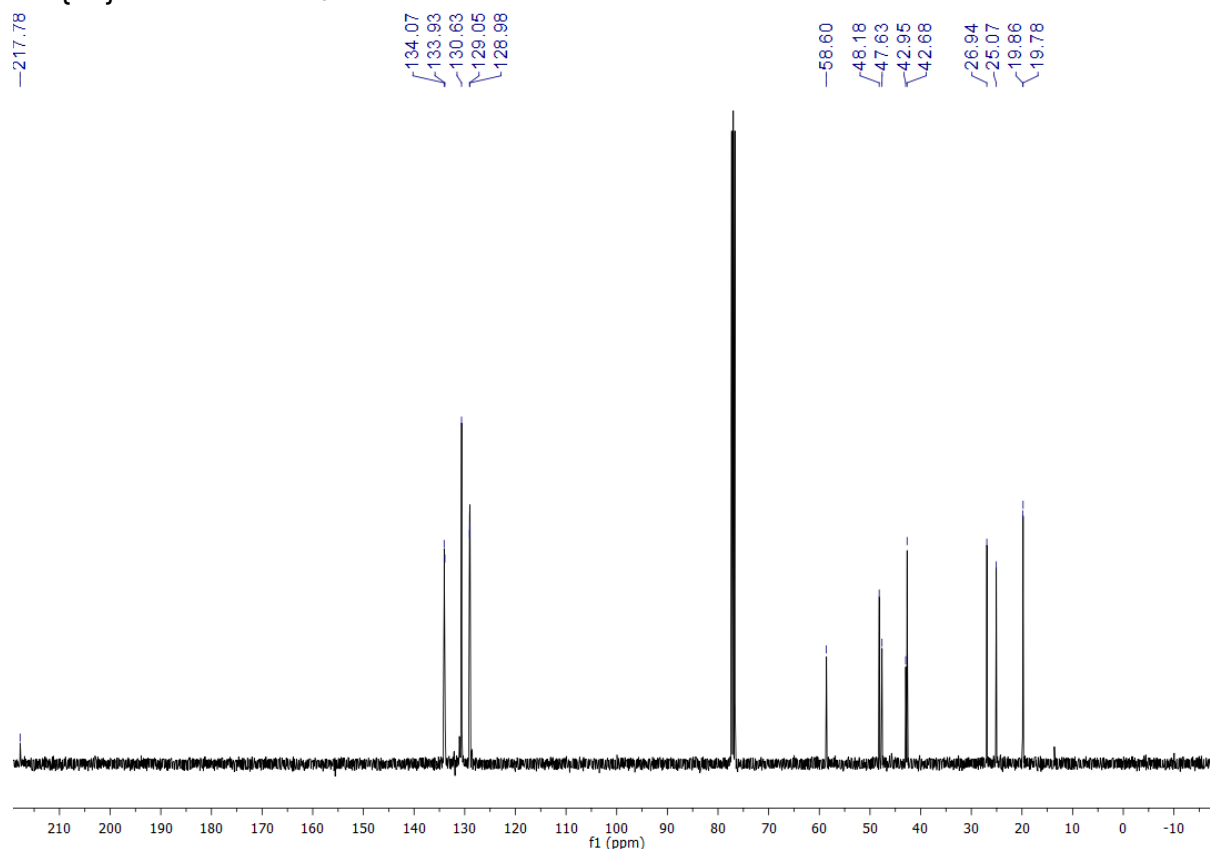



$^{31}\text{P}\{^1\text{H}\}$ -NMR in  $\text{CDCl}_3$  (300K)

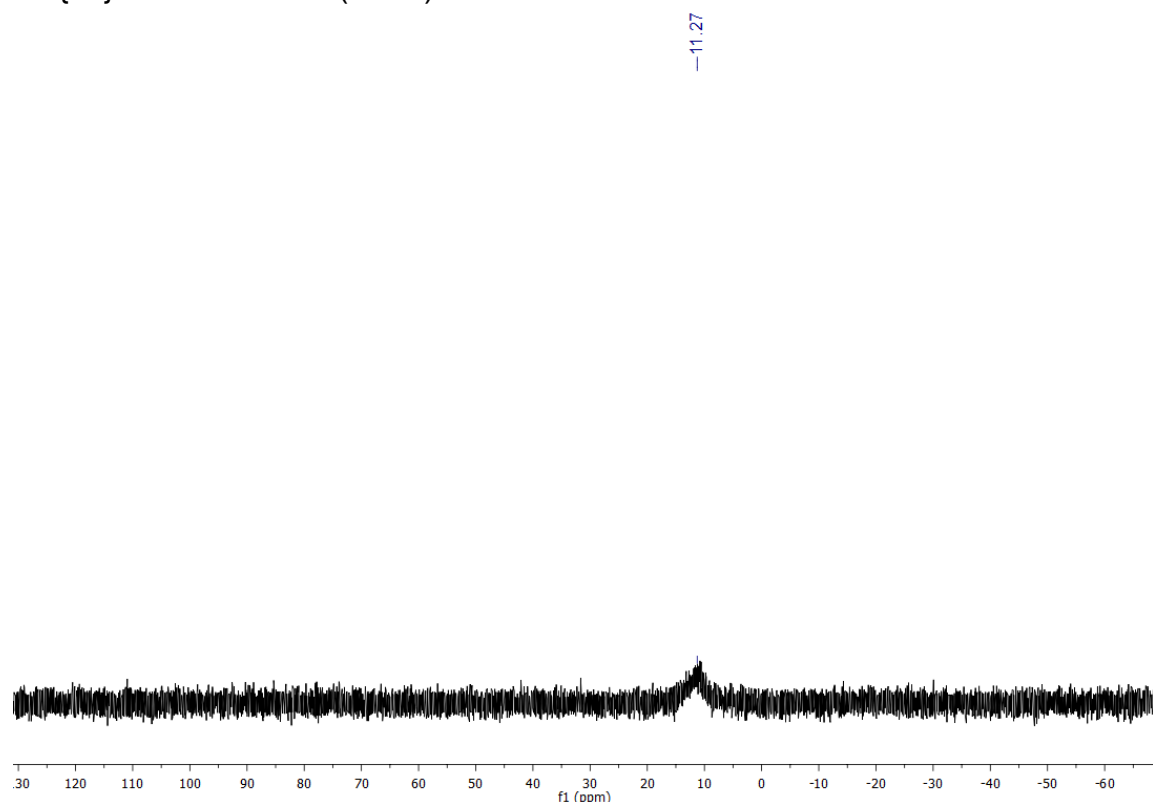

$^{31}\text{P}\{^1\text{H}\}$ -NMR in  $\text{CDCl}_3$  (223K)

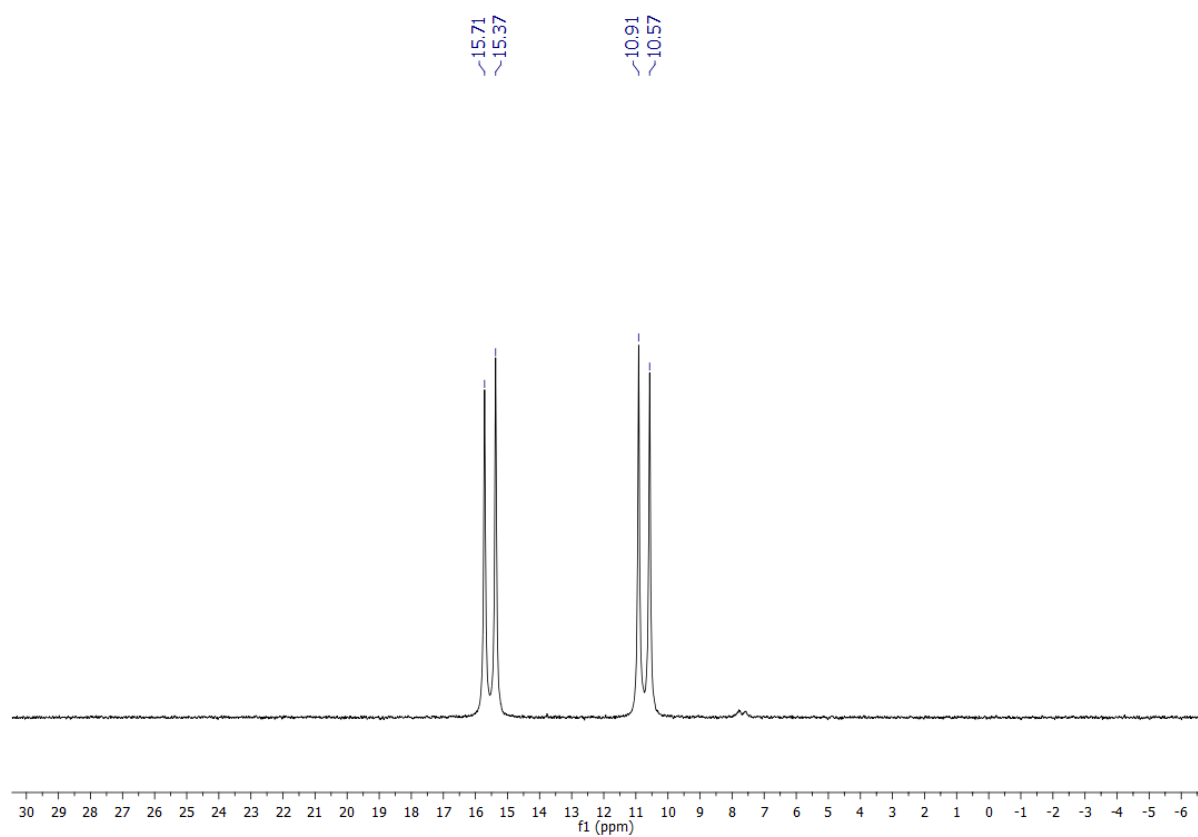

## Complex 5

$^1\text{H}$ -NMR in  $\text{CDCl}_3$

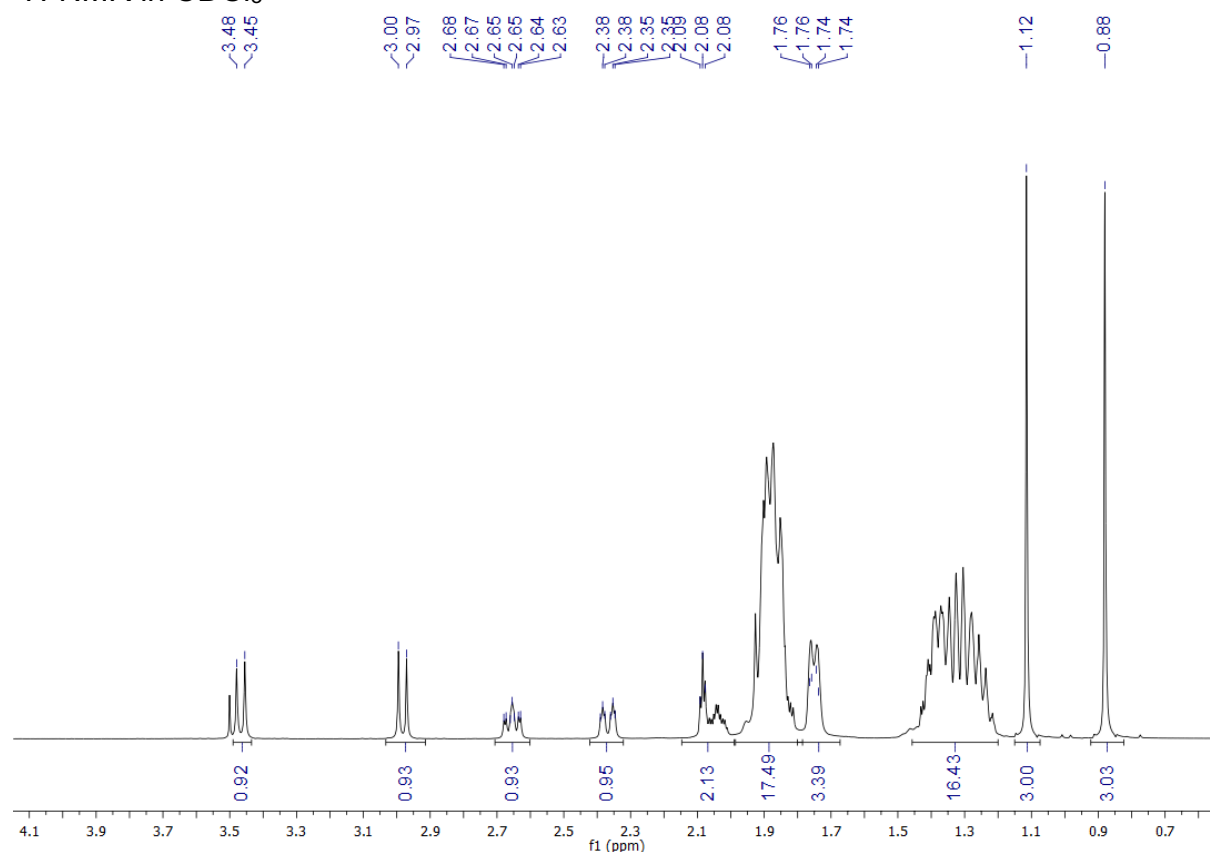

$^{13}\text{C}\{^1\text{H}\}$ -NMR in  $\text{CDCl}_3$

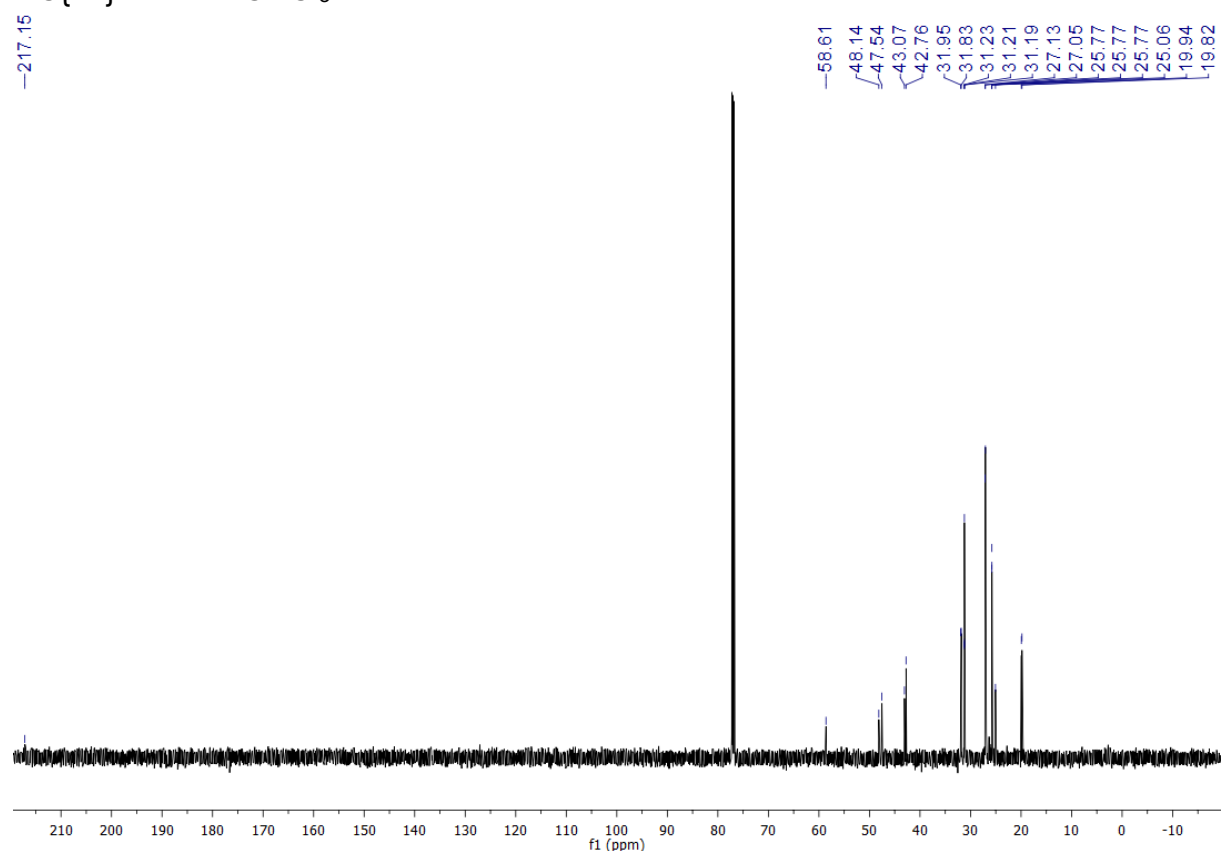

$^{31}\text{P}\{^1\text{H}\}$ -NMR in  $\text{CDCl}_3$  (300 K)

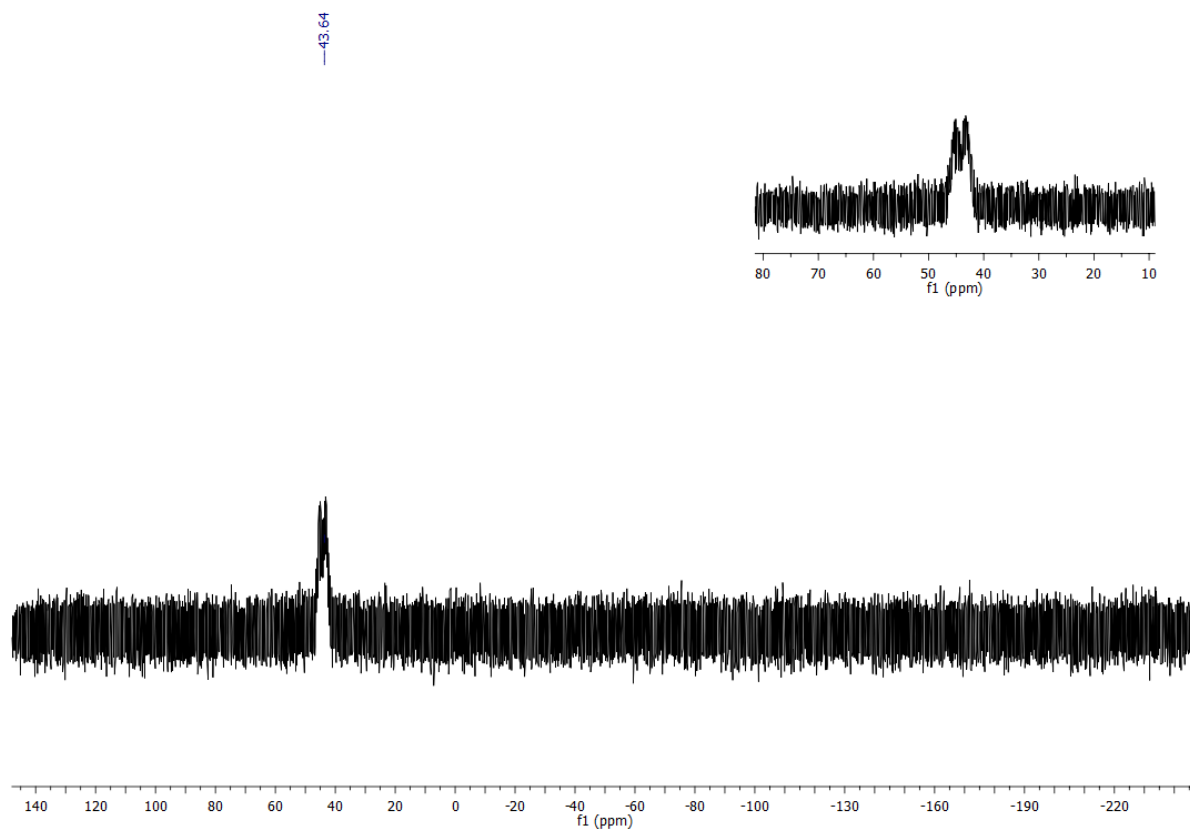

$^{31}\text{P}\{^1\text{H}\}$ -NMR in  $\text{CDCl}_3$  (223 K)

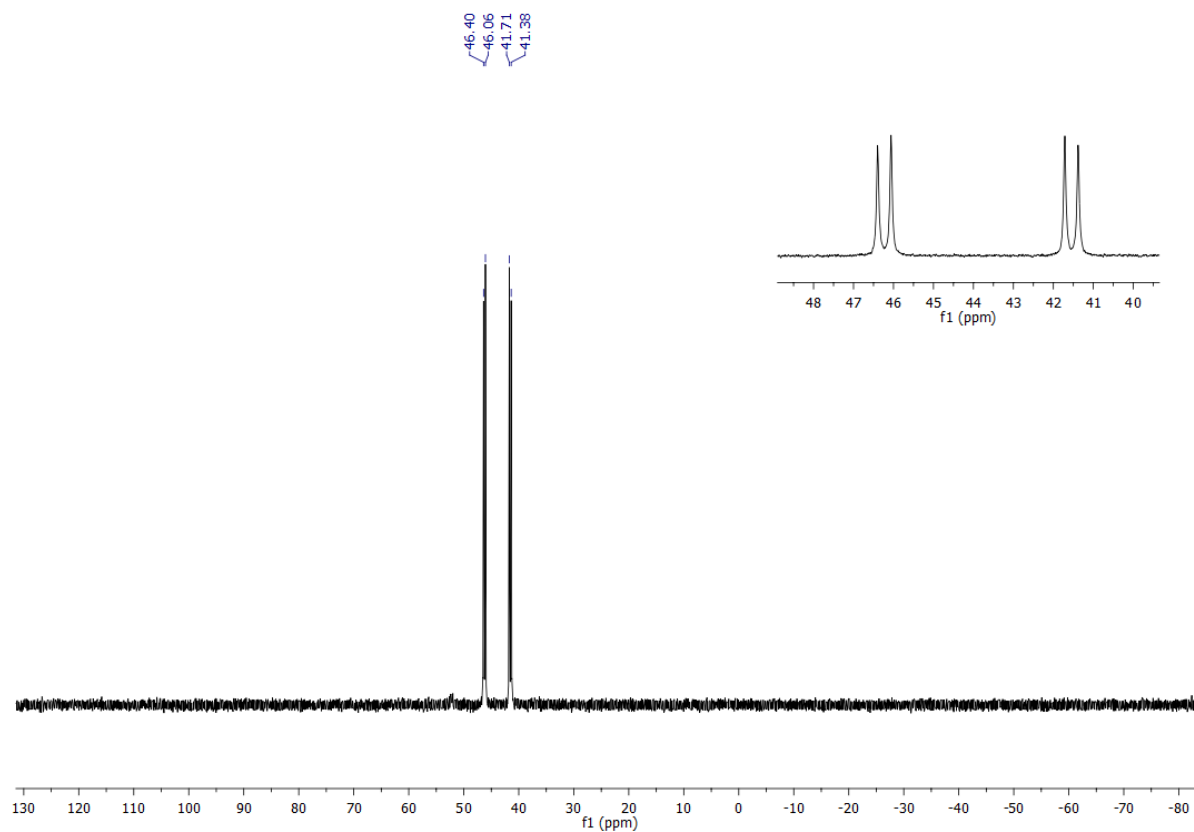

## Complex 6

$^1\text{H}$ -NMR in  $\text{D}_2\text{O}$

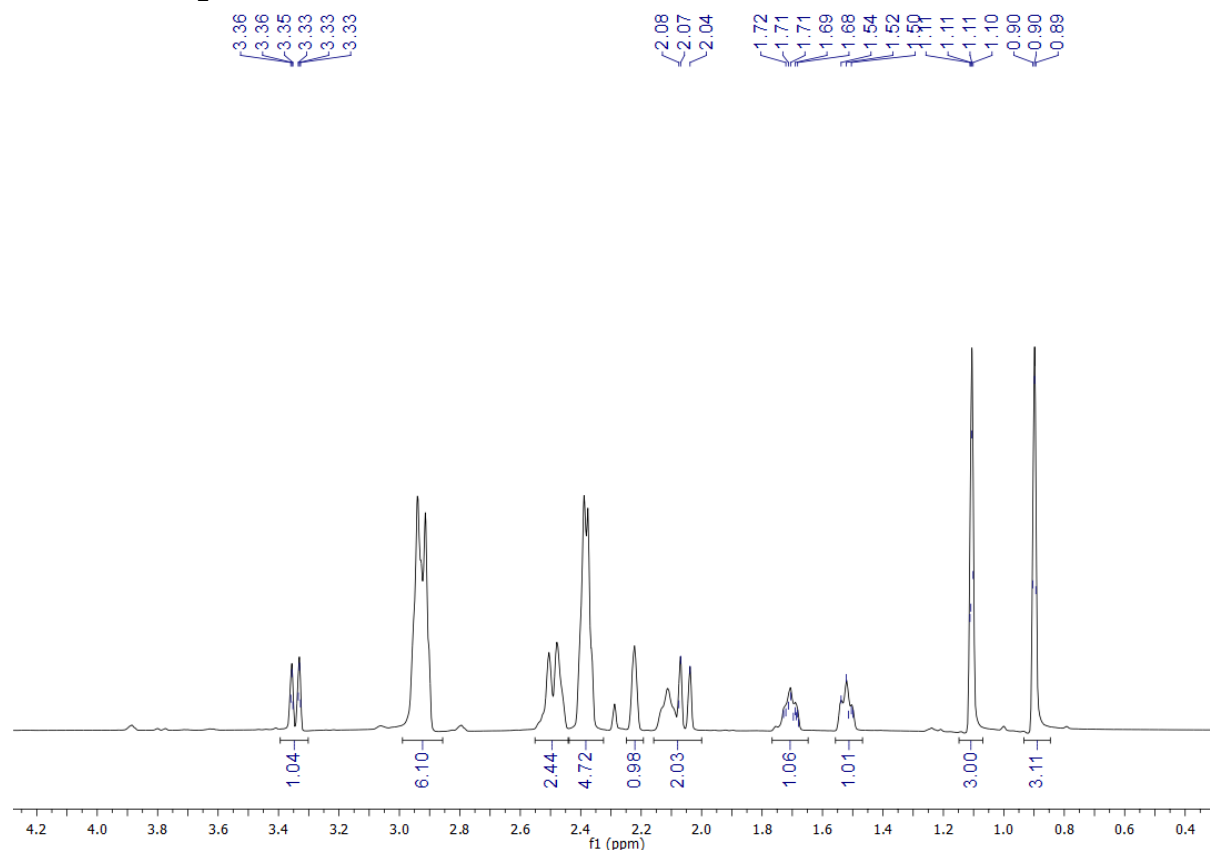

$^{13}\text{C}\{^1\text{H}\}$ -NMR in  $\text{D}_2\text{O}$

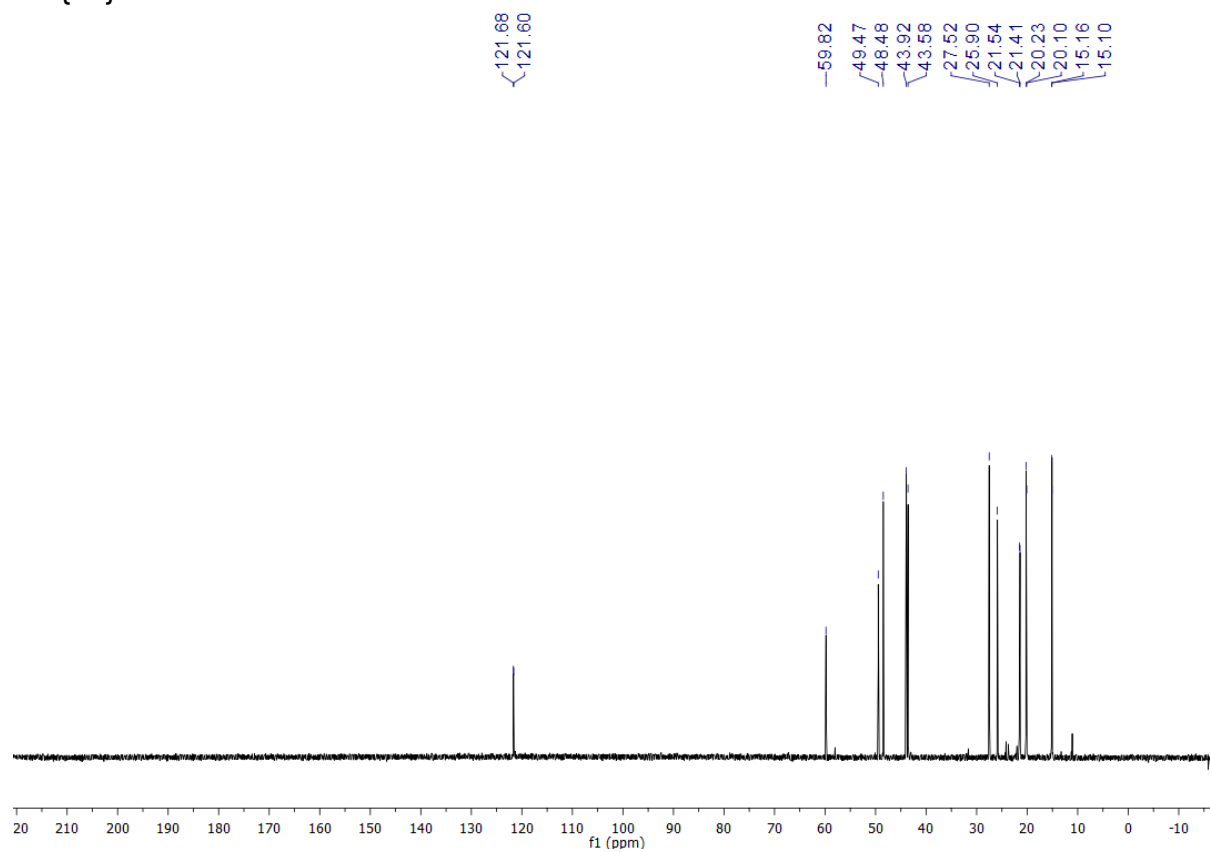

$^{31}\text{P}\{^1\text{H}\}$ -NMR in  $\text{CDCl}_3$

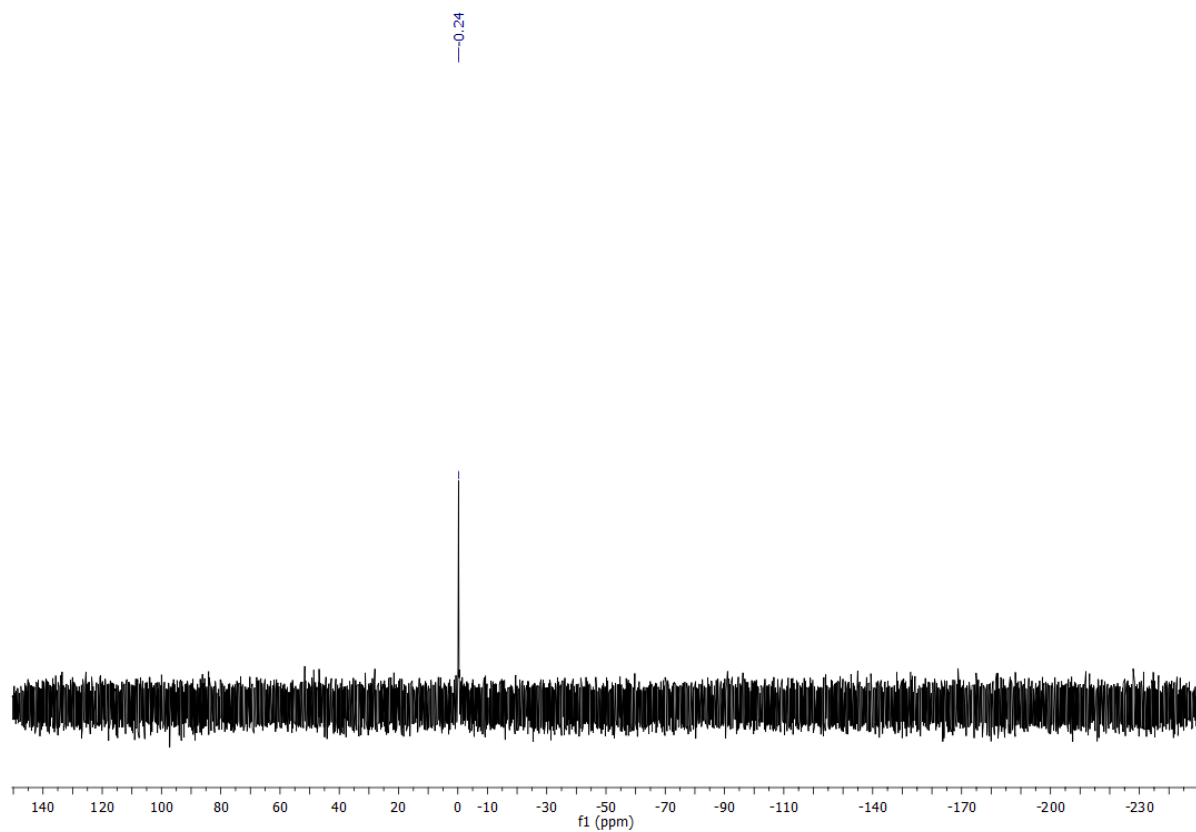

$^{31}\text{P}\{^1\text{H}\}$ -NMR in  $\text{D}_2\text{O}$

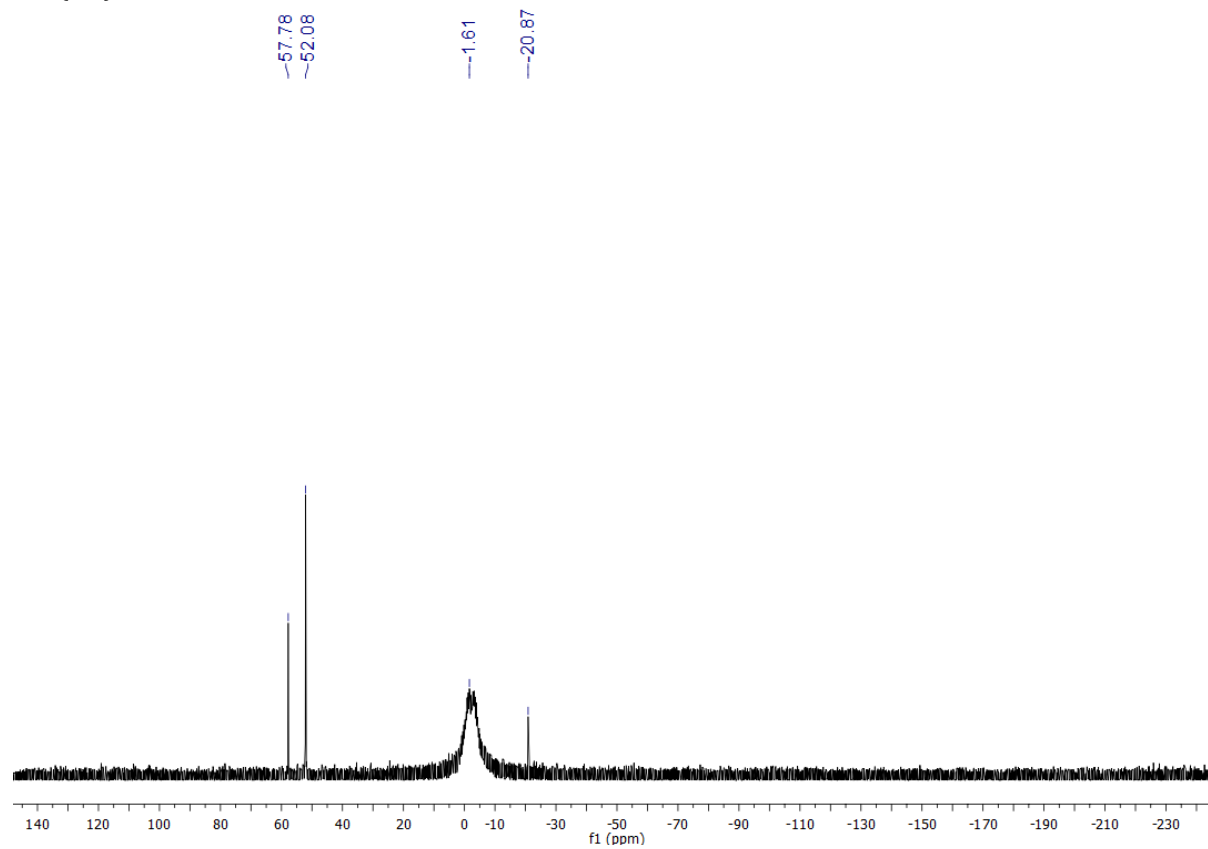

# Complex 7

## $^1\text{H}$ -NMR in $\text{CDCl}_3$

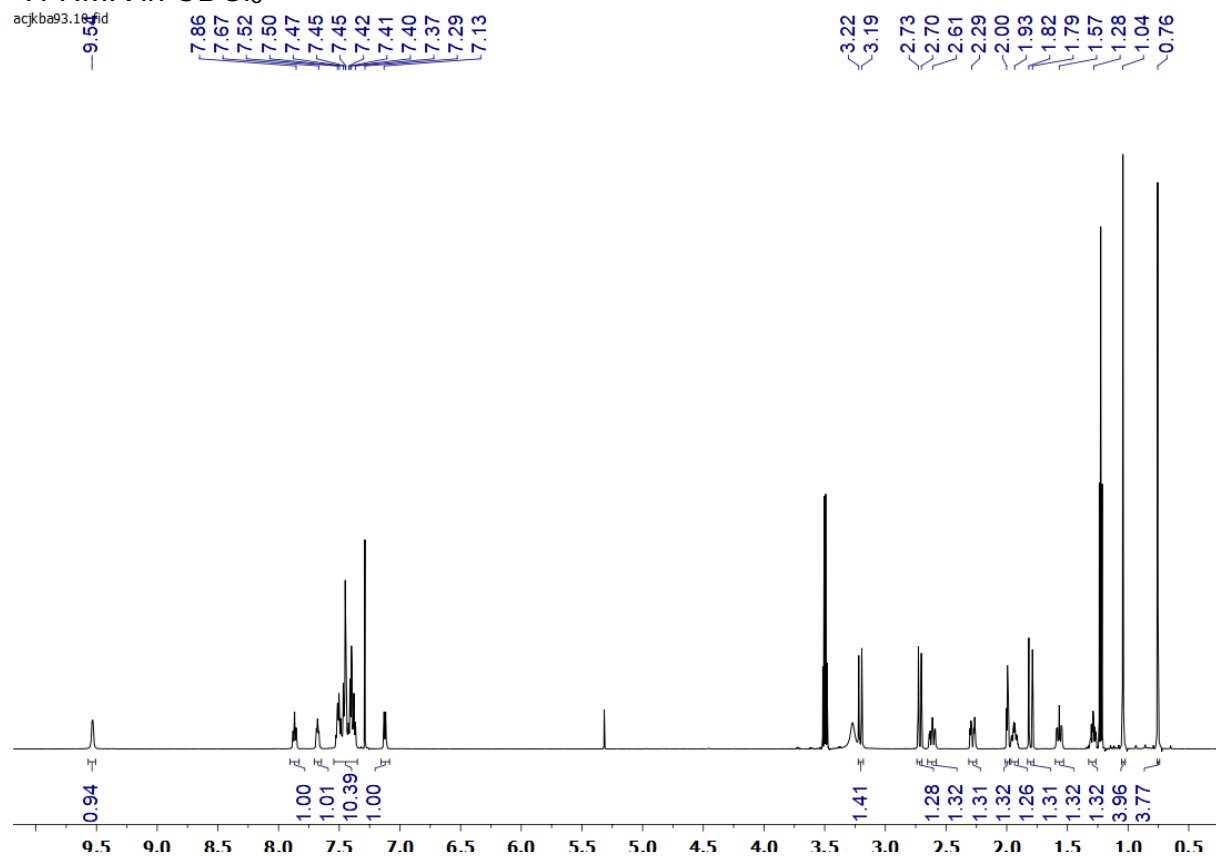

## $^{13}\text{C}\{^1\text{H}\}$ -NMR in $\text{CDCl}_3$

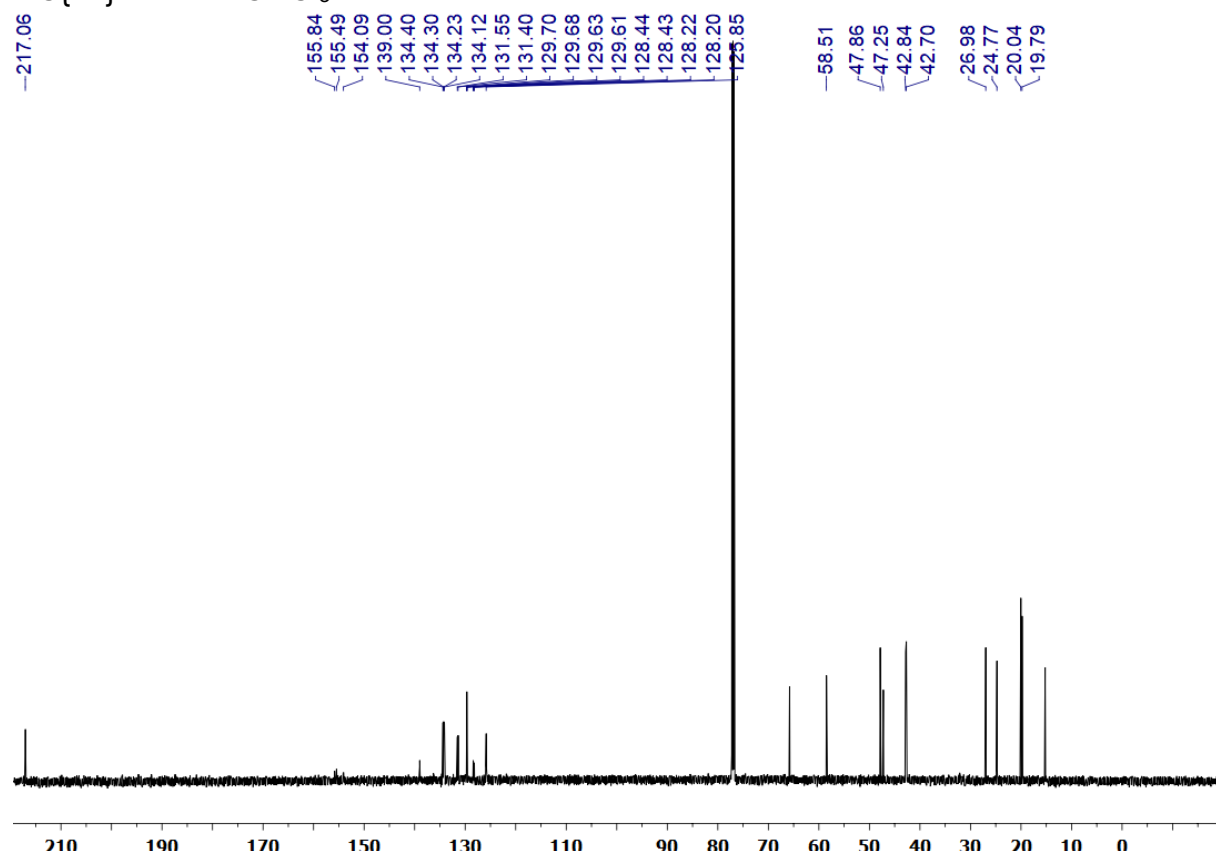

$^{31}\text{P}\{^1\text{H}\}$ -NMR in  $\text{CDCl}_3$  (300 K)

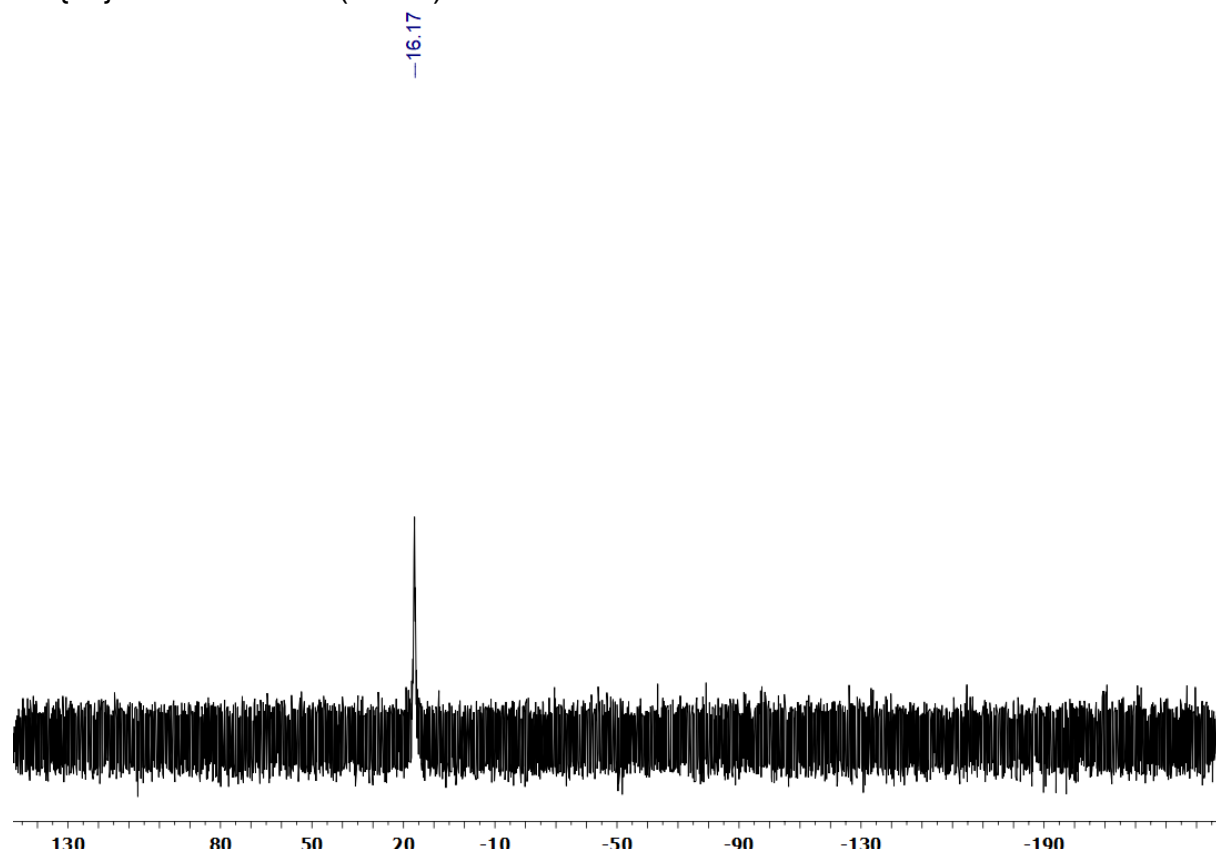

$^{31}\text{P}\{^1\text{H}\}$ -NMR in  $\text{CDCl}_3$  (223 K)

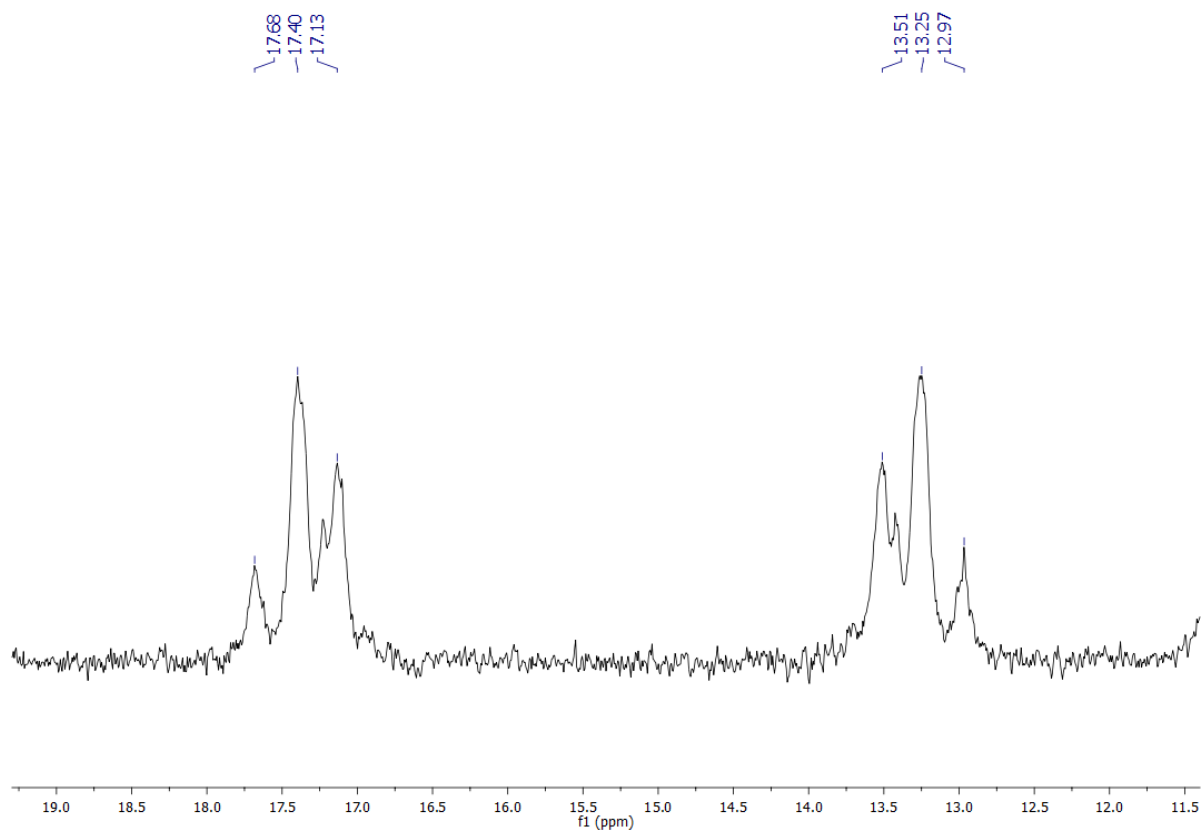

## Complex 8

$^1\text{H}$ -NMR in  $\text{CDCl}_3$

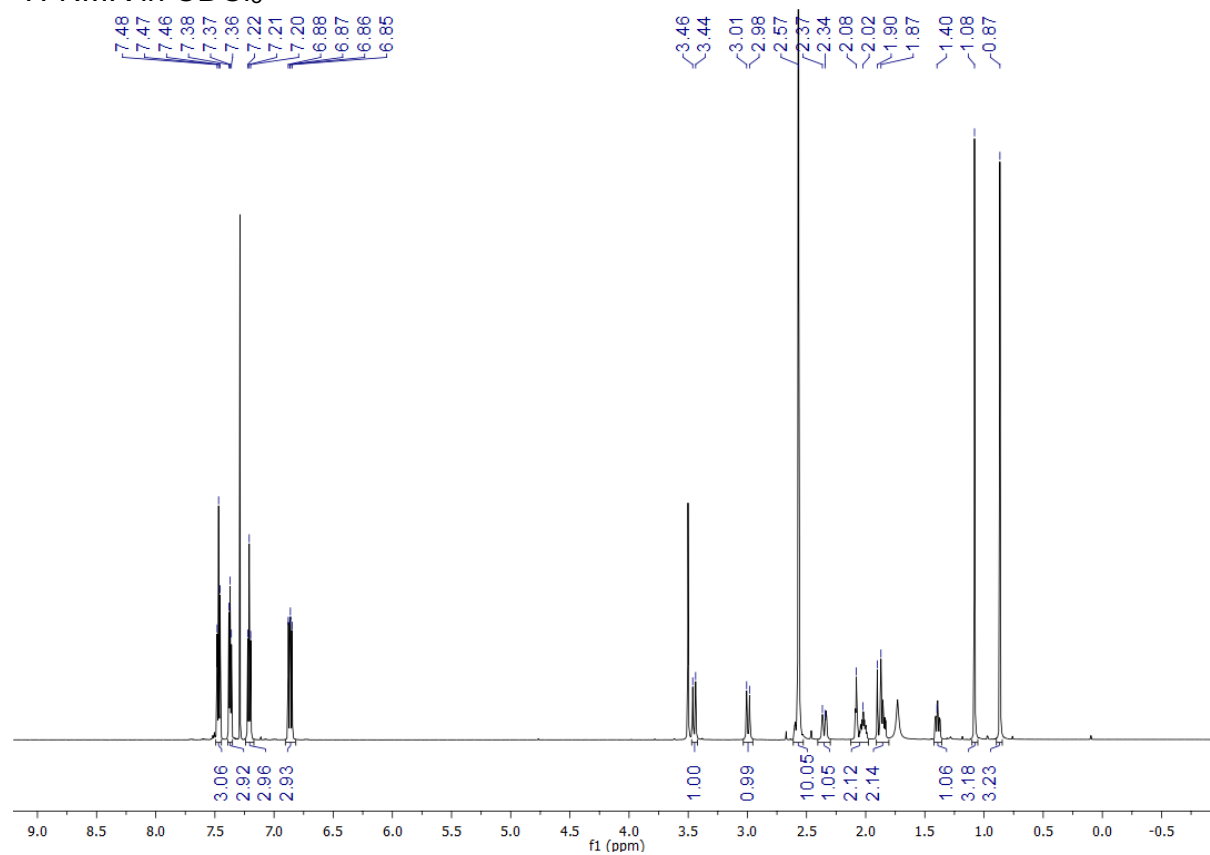

$^{13}\text{C}\{^1\text{H}\}$ -NMR in  $\text{CDCl}_3$

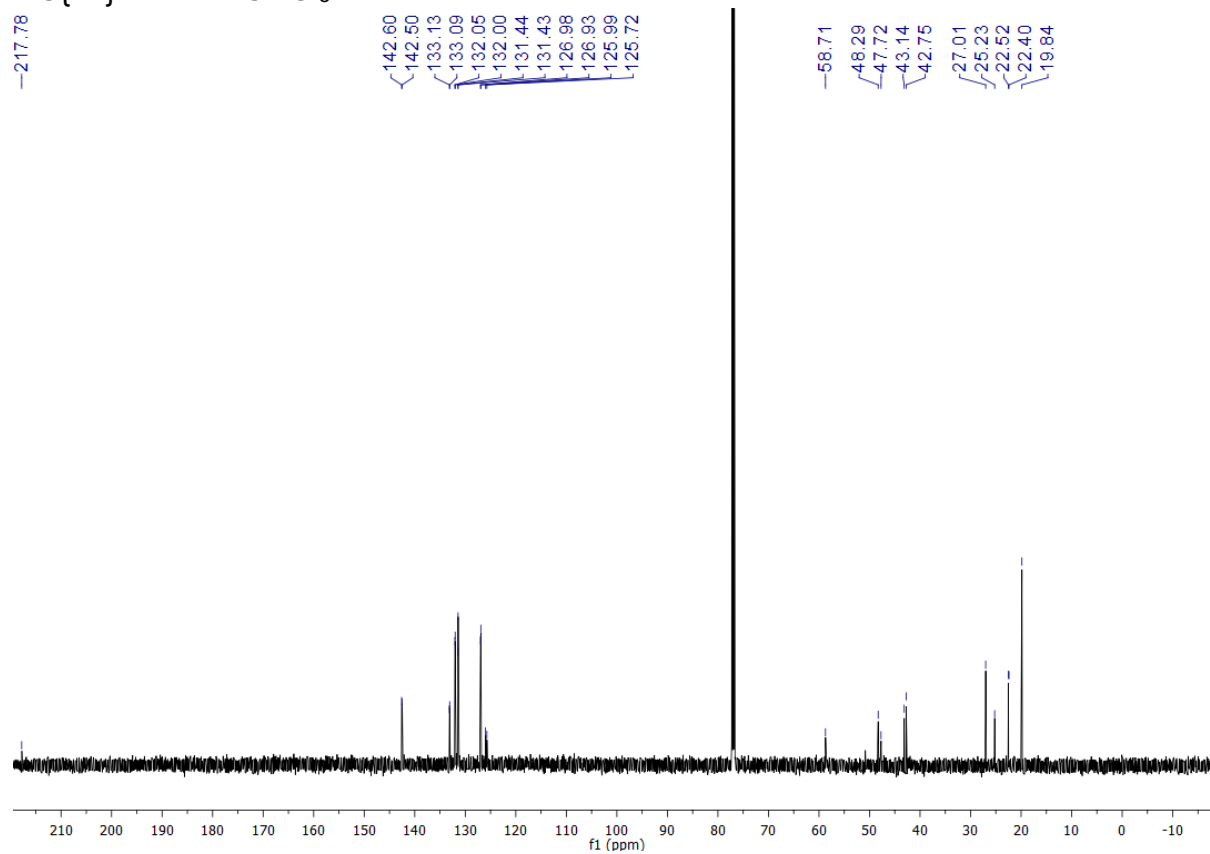



$^{31}\text{P}\{^1\text{H}\}$ -NMR in  $\text{CDCl}_3$

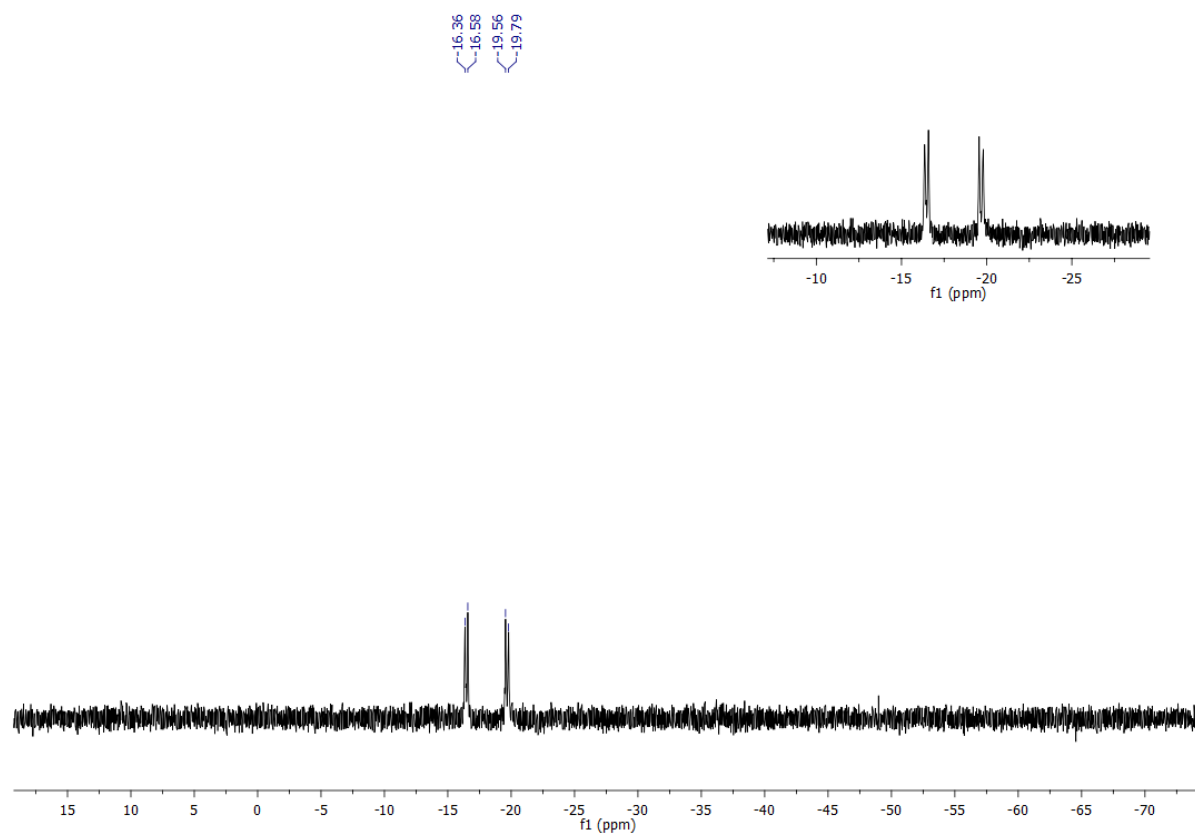

## **Hit-Confirmation**

### **Antimicrobial screening, Cytotoxicity & Haemolysis**

#### ***Procedure and Materials***

# Content

|                                                                                          |           |
|------------------------------------------------------------------------------------------|-----------|
| <b>1.0 Summary .....</b>                                                                 | <b>3</b>  |
| 1.1 Study .....                                                                          | 3         |
| 1.2 Assay Parameters.....                                                                | 3         |
| 1.3 Outcomes .....                                                                       | 3         |
| 1.4 Structural Novelty.....                                                              | 4         |
| 1.5 Publishing CO-ADD Data.....                                                          | 4         |
| <b>2.0 Methods .....</b>                                                                 | <b>5</b>  |
| 2.1 Sample Preparation .....                                                             | 5         |
| 2.2 Antibacterial Assay .....                                                            | 5         |
| 2.2.1 Procedure.....                                                                     | 5         |
| 2.2.2 Analysis .....                                                                     | 5         |
| 2.3 Antifungal Assay .....                                                               | 6         |
| 2.3.1 Procedure.....                                                                     | 6         |
| 2.3.2 Analysis .....                                                                     | 6         |
| 2.4 Cytotoxicity Assay.....                                                              | 7         |
| 2.4.1 Procedure.....                                                                     | 7         |
| 2.4.2 Analysis .....                                                                     | 7         |
| 2.5 Haemolysis Assay.....                                                                | 7         |
| 2.5.1 Procedure.....                                                                     | 7         |
| 2.5.2 Analysis .....                                                                     | 7         |
| 2.6 Antibiotic, Cytotoxic and Haemolytic Standards Preparation and Quality Control ..... | 8         |
| <b>3.0 Materials .....</b>                                                               | <b>9</b>  |
| 3.1 Assay Materials .....                                                                | 9         |
| 3.2 Standards .....                                                                      | 9         |
| 3.3 Microbial strains and cell lines .....                                               | 9         |
| <b>4.0 Controls.....</b>                                                                 | <b>10</b> |

## 1.0 Summary

### 1.1 Study

Hit Confirmation of active compounds by whole cell growth inhibition assays was conducted as an 8-point dose response to determine the Minimum Inhibitory Concentration (MIC), in duplicate (n=2). The inhibition of growth is measured against those microorganisms that showed susceptibility to the compounds tested in the Primary Screen.

Included in the Hit Confirmation were 5 bacteria: *Escherichia coli*, *Klebsiella pneumoniae*, *Acinetobacter baumannii*, *Pseudomonas aeruginosa* and *Staphylococcus aureus*, and 2 fungi *Candida albicans* and *Cryptococcus neoformans*.

In addition to determining MIC, active compounds were counter screened for cytotoxicity against a human embryonic kidney cell line, HEK293, by determining their CC<sub>50</sub> value. The compounds were also screened for haemolysis of human red blood cells.

### 1.2 Assay Parameters

| Assay Parameters          | Bacteria                                         | Fungi                                                | HEK293                                                | Haemolysis                                                       |
|---------------------------|--------------------------------------------------|------------------------------------------------------|-------------------------------------------------------|------------------------------------------------------------------|
| <b>Test concentration</b> | 32 - 0.25 µg/mL or<br>20 – 0.15 µM<br>≤0.5% DMSO | 32 - 0.25 µg/mL or<br>20 – 0.15 µM<br>≤0.5% DMSO     | 32 - 0.25 µg/mL or<br>20 – 0.15 µM<br>≤0.5% DMSO      | 32 - 0.25 µg/mL or<br>20 – 0.15 µM<br>≤0.5% DMSO                 |
| <b>QC</b>                 | Duplicate (n=2)<br>Control MIC: Pass             | Duplicate (n=2)<br>Control MIC: Pass                 | Duplicate (n=2)<br>Control CC <sub>50</sub> :<br>Pass | Duplicate (n=2)<br>Control HC <sub>10</sub> :<br>Pass            |
| <b>Plates</b>             | Non-Binding<br>Surface (NBS),<br>384-well plate  | Non-Binding<br>Surface (NBS),<br>384-well plate      | TC, 384-well<br>black wall/clear<br>bottom            | Polypropylene<br>384-well and<br>polystyrene 384-<br>well plates |
| <b>Media</b>              | Cation-adjusted<br>Mueller Hinton<br>broth       | Yeast Nitrogen<br>Base                               | DMEM<br>supplemented<br>with 10% FBS                  | 0.9% NaCl                                                        |
| <b>Read Out</b>           | OD <sub>600</sub>                                | OD <sub>630</sub><br>Resazurin OD <sub>600-570</sub> | Resazurin F <sub>560/590</sub>                        | OD <sub>405</sub>                                                |

### 1.3 Outcomes

Hit Confirmation outcomes are detailed in individual Project reports, personalised for each Project Submission for each CO-ADD user.

Please see your data sheet with file extension **P0XXX\_HC\_data.xlsx**, for example CO-ADD Project **P0100**, **P0100\_HC\_data.xlsx**

## 1.4 Structural Novelty

As per the T&C's of CO-ADD, structures for all submitted compounds for antimicrobial screening should be disclosed to CO-ADD following Primary Screening. Without structures for all submitted compounds, Hit Confirmation assays will not be triggered.

If you have not already done so, please **provide CO-ADD with the chemical structure** of the full sample set in this study (both for compounds showing activity and those that do not), which will allow CO-ADD to filter out future samples with the same, or highly similar structure. In addition, please **notify CO-ADD** if you agree to publish the data (*i.e.* structures and activity) in the public bioactive database ChEMBL ([www.ebi.ac.uk/chembl/](http://www.ebi.ac.uk/chembl/)). CO-ADD aims to increase the public knowledge of antimicrobial research, including data about non-active compounds.

All confirmed hits, without cytotoxicity or haemolytic activity, will be considered for further Hit-Validation, after a detailed analysis of structure-activity relationship and antimicrobial novelty, within CO-ADD samples, as well as, within public antimicrobial activity databases, like ChEMBL ([www.ebi.ac.uk/chembl/](http://www.ebi.ac.uk/chembl/)).

## 1.5 Publishing CO-ADD Data

If you wish to publish data provided by CO-ADD we kindly ask that you acknowledge CO-ADD appropriately with the following text:

*“Antimicrobial screening was performed by CO-ADD (The Community for Antimicrobial Drug Discovery), funded by the Wellcome Trust (UK) and The University of Queensland (Australia).”*

Please advise us at your earliest convenience that you have used provided data for publication purposes. This information is extremely helpful in keeping track of the outputs from the CO-ADD initiative and supports the program in renewed funding possibilities to continue CO-ADD as a free screening service available to the academic community.

CO-ADD also asks, that where possible you publish your data in an openly accessible journal.

## 2.0 Methods

### 2.1 Sample Preparation

Samples were provided by the collaborator and stored frozen at -20 °C. Samples were prepared in DMSO and water to a final testing concentration of 32 µg/mL or 20 µM (unless otherwise indicated in the data sheet) and serially diluted 1:2 fold for 8 times. Each sample concentration was prepared in 384-well plates, non-binding surface plate (**NBS**; Corning 3640) for each bacterial/fungal strain, tissue-culture treated (**TC-treated**; Corning 3712/3764) black for mammalian cell types and polypropylene 384-well (**PP**; Corning 3657) for haemolysis assays, all in duplicate (n=2), and keeping the final DMSO concentration to a maximum of 0.5%. All the sample preparation was done using liquid handling robots.

Compounds that showed notable solubility issues during stock solution preparation are detailed in the **Data sheet** for the individual Project.

### 2.2 Antibacterial Assay

#### 2.2.1 Procedure

All bacteria were cultured in Cation-adjusted Mueller Hinton broth (**CAMHB**) at 37 °C overnight. A sample of each culture was then diluted 40-fold in fresh broth and incubated at 37 °C for 1.5-3 h. The resultant mid-log phase cultures were diluted (CFU/mL measured by OD<sub>600</sub>), then added to each well of the compound containing plates, giving a cell density of 5×10<sup>5</sup> CFU/mL and a total volume of 50 µL. All the plates were covered and incubated at 37 °C for 18 h without shaking.

#### 2.2.2 Analysis

Inhibition of bacterial growth was determined measuring absorbance at 600 nm (OD<sub>600</sub>), using a Tecan M1000 Pro monochromator plate reader. The percentage of growth inhibition was calculated for each well, using the negative control (media only) and positive control (bacteria without inhibitors) on the same plate as references.

The percentage of growth inhibition was calculated for each well, using the negative control (media only) and positive control (bacteria without inhibitors) on the same plate. The MIC was determined as the lowest concentration at which the growth was fully inhibited, defined by an inhibition ≥ 80%. In addition, the maximal percentage of growth inhibition is reported as D<sub>Max</sub>, indicating any compounds with partial activity.

Hits were classified by MIC ≤ 16 µg/mL or MIC ≤ 10 µM in either replicate (n=2 on different plates).

## 2.3 Antifungal Assay

### 2.3.1 Procedure

Fungi strains were cultured for 3 days on Yeast Extract-Peptone Dextrose (YPD) agar at 30 °C. A yeast suspension of  $1 \times 10^6$  to  $5 \times 10^6$  CFU/mL (as determined by OD<sub>530</sub>) was prepared from five colonies. The suspension was subsequently diluted and added to each well of the compound-containing plates giving a final cell density of fungi suspension of  $2.5 \times 10^3$  CFU/mL and a total volume of 50 µL. All plates were covered and incubated at 35 °C for 36 h without shaking.

### 2.3.2 Analysis

Growth inhibition of *C. albicans* was determined measuring absorbance at 630 nm (OD<sub>630</sub>), while the growth inhibition of *C. neoformans* was determined measuring the difference in absorbance between 600 and 570 nm (OD<sub>600-570</sub>), after the addition of resazurin (0.001% final concentration) and incubation at 35 °C for 2 h. The absorbance was measured using a Biotek Multiflo Synergy HTX plate reader.

In both cases, the percentage of growth inhibition was calculated for each well, using the negative control (media only) and positive control (fungi without inhibitors) on the same plate. The MIC was determined as the lowest concentration at which the growth was fully inhibited, defined by an inhibition  $\geq 80\%$  for *C. albicans* and an inhibition  $\geq 70\%$  for *C. neoformans*. Due to a higher variance in growth and inhibition, a lower threshold was applied to the data for *C. neoformans*. In addition, the maximal percentage of growth inhibition is reported as D<sub>Max</sub>, indicating any compounds with marginal activity.

Hits were classified by MIC  $\leq 16$  µg/mL or MIC  $\leq 10$  µM in either replicate (n=2 on different plates).

## 2.4 Cytotoxicity Assay

### 2.4.1 Procedure

HEK293 cells were counted manually in a Neubauer haemocytometer and then plated in the 384-well plates containing the compounds to give a density of 5000 cells/well in a final volume of 50  $\mu$ L. **DMEM** supplemented with **10% FBS** was used as growth media and the cells were incubated together with the compounds for 20 h at 37 °C in 5% CO<sub>2</sub>.

### 2.4.2 Analysis

Cytotoxicity (or cell viability) was measured by fluorescence, ex: 560/10 nm, em: 590/10 nm (F<sub>560/590</sub>), after addition of 5  $\mu$ L of 25  $\mu$ g/mL resazurin (2.3  $\mu$ g/mL final concentration) and after incubation for further 3 h at 37 °C in 5% CO<sub>2</sub>. The fluorescence intensity was measured using a Tecan M1000 Pro monochromator plate reader, using automatic gain calculation.

CC<sub>50</sub> (concentration at 50% cytotoxicity) were calculated by curve fitting the inhibition values vs. log(concentration) using a sigmoidal dose-response function, with variable fitting values for bottom, top and slope. In addition, the maximal percentage of cytotoxicity is reported as D<sub>Max</sub>, indicating any compounds with partial cytotoxicity.

The curve fitting was implemented using Pipeline Pilot's dose-response component, resulting in similar values to curve fitting tools such as GraphPad's Prism and IDBS's XIFit. Any value with > indicate sample with no activity (low D<sub>Max</sub> value) or samples with CC<sub>50</sub> values above the maximum tested concentration (higher D<sub>Max</sub> value).

Cytotoxic samples were classified by CC<sub>50</sub>  $\leq$  32  $\mu$ g/mL or CC<sub>50</sub>  $\leq$  10  $\mu$ M in either replicate (n=2 on different plates). In addition, samples were flagged as partial cytotoxic if D<sub>Max</sub>  $\geq$  50%, even with CC<sub>50</sub> > the maximum tested concentration.

## 2.5 Haemolysis Assay

### 2.5.1 Procedure

Human whole blood was washed three times with 3 volumes of 0.9% NaCl and then resuspended in same to a concentration of 0.5 x 10<sup>8</sup> cells/mL, as determined by manual cell count in a Neubauer haemocytometer. The washed cells were then added to the 384-well compound-containing plates for a final volume of 50  $\mu$ L. After a 10 min shake on a plate shaker the plates were then incubated for 1 h at 37 °C. After incubation, the plates were centrifuged at 1000g for 10 min to pellet cells and debris, 25  $\mu$ L of the supernatant was then transferred to a polystyrene 384-well assay plate.

### 2.5.2 Analysis

Haemolysis was determined by measuring the supernatant absorbance at 405 nm (OD<sub>405</sub>). The absorbance was measured using a Tecan M1000 Pro monochromator plate reader.

HC<sub>10</sub> and HC<sub>50</sub> (concentration at 10% and 50% haemolysis, respectively) were calculated by curve fitting the inhibition values vs. log(concentration) using a sigmoidal dose-response function with variable fitting values for top, bottom and slope. In addition, the maximal



percentage of haemolysis is reported as  $D_{Max}$ , indicating any compounds with partial haemolysis.

The curve fitting was implemented using Pipeline Pilot's dose-response component, resulting in similar values to curve fitting tools such as GraphPad's Prism and IDBS's XIFit. Any value with > indicate sample with no activity (low  $D_{Max}$  value) or samples with  $HC_{10}$  values above the maximum tested concentration (higher  $D_{Max}$  value).

Haemolysis samples were classified by  $HC_{10} \leq 32 \mu\text{g/mL}$  or  $HC_{10} \leq 10 \mu\text{M}$  in either replicate ( $n=2$  on different plates). In addition, samples were flagged as partial haemolytic if  $D_{Max} \geq 50\%$ , even with  $HC_{10} >$  the maximum tested concentration.

## 2.6 Antibiotic, Cytotoxic and Haemolytic Standards Preparation and Quality Control

Colistin and Vancomycin were used as positive bacterial inhibitor standards for Gram-negative and Gram-positive bacteria, respectively. Fluconazole was used as a positive fungal inhibitor standard for *C. albicans* and *C. neoformans*. Tamoxifen was used as a positive cytotoxicity standard. Melittin was used as a positive haemolytic standard.

Each antibiotic standard was provided in 4 concentrations, with 2 above and 2 below its MIC or  $CC_{50}$  value, and plated into the first 8 wells of column 23 of the 384-well NBS plates. Tamoxifen and melittin was used in 8 concentrations in 2 fold serial dilutions with 50  $\mu\text{g/mL}$  highest concentration.

The quality control (QC) of the assays was determined by Z'-Factor, calculated from the Negative (media only) and Positive Controls (bacterial, fungal or cell culture without inhibitor), and the Standards. Plates with a Z'-Factor of  $\geq 0.4$  and Standards active at the highest and inactive at the lowest concentration, were accepted for further data analysis.

## 3.0 Materials

### 3.1 Assay Materials

| Material                                           | Code                    | Brand/Supplier     | Cat No.   |
|----------------------------------------------------|-------------------------|--------------------|-----------|
| Compound preparation plate, Polypropylene          | PP                      | Corning            | 3364      |
| Assay Plates – Antimicrobial Non-binding surface   | NBS 384w                | Corning            | 3640      |
| Assay Plates – Cytotoxicity Tissue culture treated | Black/Clear bottom 384w | Corning            | 3712      |
| Assay Plates - Haemolysis                          | PP-Haem                 | Corning            | 3657      |
| Reading Plates - Haemolysis                        | Clear 384w              | Corning            | 3680      |
| Growth media - bacteria                            | CAMHB                   | Bacto Laboratories | 212322    |
| Culture agar - fungi                               | YPD                     | Becton Dickinson   | 242720    |
| Growth media - fungi                               | YNB                     | Becton Dickinson   | 233520    |
| Resazurin                                          |                         | Sigma-Aldrich      | R7017     |
| Dulbecco's Modified Eagle Medium                   | DMEM                    | Life Technologies  | 11995-073 |
| Foetal Bovine Serum                                | FBS                     | Bovogen            | FFBS-500  |
| 0.9% NaCl                                          | Saline                  | Baxter             | AHF7124   |

### 3.2 Standards

| Sample Name        | Sample ID     | Full MW | Stock Conc. (mg/mL) | Solvent | Source        |
|--------------------|---------------|---------|---------------------|---------|---------------|
| Colistin - Sulfate | MCC_000094:02 | 1400.63 | 10.0                | DMSO    | Sigma; C4461  |
| Vancomycin - HCL   | MCC_000095:02 | 1485.71 | 10.0                | DMSO    | Sigma; 861987 |
| Fluconazole        | MCC_008383:01 | 306.27  | 2.56                | DMSO    | Sigma; F8929  |
| Tamoxifen          | MCC_000096:01 | 371.50  | 10                  | DMSO    | Sigma; T5648  |
| Melittin           | MCC_008868:02 | 2846.46 | 10                  | water   | Sigma: M2272  |

### 3.3 Microbial strains and cell lines

| ID     | Batch | Organism                       | Strain           | Description            |
|--------|-------|--------------------------------|------------------|------------------------|
| GN_001 | 02    | <i>Escherichia coli</i>        | ATCC 25922       | FDA control strain     |
| GN_003 | 02    | <i>Klebsiella pneumoniae</i>   | ATCC 700603      | MDR                    |
| GN_034 | 02    | <i>Acinetobacter baumannii</i> | ATCC 19606       | Type strain            |
| GN_042 | 02    | <i>Pseudomonas aeruginosa</i>  | ATCC 27853       | Quality control strain |
| GP_020 | 02    | <i>Staphylococcus aureus</i>   | ATCC 43300       | MRSA                   |
| FG_001 | 01    | <i>Candida albicans</i>        | ATCC 90028       | CLSI reference         |
| FG_002 | 01    | <i>Cryptococci neoformans</i>  | ATCC 208821      | H99, Type strain       |
| MA_007 | 01    | Human embryonic kidney cells   | ATCC CRL-1573    | HEK 293                |
| HA_150 | -     | Human                          | ARCBS 5400 00150 | Whole blood            |

## 4.0 Controls

All standard compound controls displayed inhibitory values within the expected range for each assay type and each organism tested. For actual inhibitory results for controls please contact the CO-ADD at [support@co-add.org](mailto:support@co-add.org).

| Strain ID | Species                    | Standard positive inhibitor control | Pass/Fail |
|-----------|----------------------------|-------------------------------------|-----------|
| GN_001:02 | <i>E. coli</i>             | Colistin                            | Pass      |
| GN_003:02 | <i>K. pneumoniae</i> (MDR) | Colistin                            | Pass      |
| GN_034:02 | <i>A. baumannii</i>        | Colistin                            | Pass      |
| GN_042:02 | <i>P. aeruginosa</i>       | Colistin                            | Pass      |
| GP_020:02 | <i>S. aureus</i> (MRSA)    | Vancomycin                          | Pass      |
| FG_001:01 | <i>C. albicans</i>         | Fluconazole                         | Pass      |
| FG_002:01 | <i>C. neoformans</i> (H99) | Fluconazole                         | Pass      |
| MA_007:01 | HEK293                     | Tamoxifen                           | Pass      |
| HA_150    | <i>Homo sapiens</i>        | Melittin                            | Pass      |
